# Supplementary material for: Investigation of Chemical Composition and Biological Activities of Ajuga pyramidalis—Isolation of Iridoids and Phenylethanoid Glycosides
Source: MDPI journal article supplement (doi:10.3390/metabo13010128), 2023-01-14
Supplement: s1 [file s1]

# Supporting Information

## Investigation of Chemical Compositions and Biological Activities of *Ajuga pyramidalis* – Isolation of Iridoids and Phenylethanoid Glycosides

Anthonin Gori <sup>1,2</sup>, Benjamin Boucherle <sup>1</sup>, Aurélien Rey <sup>2</sup>, Maxime Rome <sup>3</sup>, Caroline Barette <sup>4</sup>, Emmanuelle Soleilhac <sup>4</sup>, Christian Philouze <sup>5</sup>, Marie-Odile Fauvarque <sup>4</sup>, Nicola Fuzzati <sup>2</sup> and Marine Peuchmaur <sup>1,\*</sup>

<sup>1</sup> Univ. Grenoble Alpes, CNRS, DPM, 38000 Grenoble, France

<sup>2</sup> CHANEL Parfums Beauté, 93500 Pantin, France

<sup>3</sup> Jardin du Lautaret, CNRS, Université Grenoble Alpes, Grenoble, France

<sup>4</sup> Univ. Grenoble Alpes, CEA, Inserm, IRIG, BGE, F-38000 Grenoble, France

<sup>5</sup> Univ. Grenoble Alpes, CNRS, DCM, 38000 Grenoble, France

\* Correspondence: marine.peuchmaur@univ-grenoble-alpes.fr; Tel.: +33476635295

### List of supplementary files:

**Figure S1.** Global composition of the extracts of *A. pyramidalis*

**Figure S2.** <sup>1</sup>H NMR spectrum of echinacoside (CD<sub>3</sub>OD, 500 MHz)

**Figure S3.** <sup>13</sup>C NMR spectrum of echinacoside (CD<sub>3</sub>OD, 125 MHz)

**Figure S4.** COSY spectrum of echinacoside (CD<sub>3</sub>OD)

**Figure S5.** HSQC spectrum of echinacoside (CD<sub>3</sub>OD)

**Figure S6.** <sup>1</sup>H NMR spectrum of verbascoside (CD<sub>3</sub>OD, 500 MHz)

**Figure S7.** <sup>13</sup>C NMR spectrum of verbascoside (CD<sub>3</sub>OD, 125 MHz)

**Figure S8.** COSY spectrum of verbascoside (CD<sub>3</sub>OD)

**Figure S9.** HSQC spectrum of verbascoside (CD<sub>3</sub>OD)

**Figure S10.** HMBC spectrum of verbascoside (CD<sub>3</sub>OD)

**Figure S11.** <sup>1</sup>H NMR spectrum of teupolioside (CD<sub>3</sub>OD, 500 MHz)

**Figure S12.** <sup>13</sup>C NMR spectrum of teupolioside (CD<sub>3</sub>OD, 125 MHz)

**Figure S13.** COSY spectrum of teupolioside (CD<sub>3</sub>OD)

**Figure S14.** HSQC spectrum of teupolioside (CD<sub>3</sub>OD)

**Figure S15.** HMBC spectrum of teupolioside (CD<sub>3</sub>OD)

**Figure S16.** <sup>1</sup>H NMR spectrum of harpagide (CD<sub>3</sub>OD, 400 MHz)

**Figure S17.** <sup>13</sup>C NMR spectrum of harpagide (CD<sub>3</sub>OD, 100 MHz)

**Figure S18.** COSY spectrum of harpagide (CD<sub>3</sub>OD)

**Figure S19.** HSQC spectrum of harpagide (CD<sub>3</sub>OD)

**Figure S20.** HMBC spectrum of harpagide (CD<sub>3</sub>OD)

**Figure S21.**  $^1\text{H}$  NMR spectrum of 8-*O*-acetylharpagide (DMSO- $d_6$ , 400 MHz)

**Figure S22.**  $^{13}\text{C}$  NMR spectrum of 8-*O*-acetylharpagide (DMSO- $d_6$ , 100 MHz)

**Figure S23.** COSY spectrum of 8-*O*-acetylharpagide (DMSO- $d_6$ )

**Figure S24.** HSQC spectrum of 8-*O*-acetylharpagide (DMSO- $d_6$ )

**Figure S25.** HMBC spectrum of 8-*O*-acetylharpagide (DMSO- $d_6$ )

**Figure S26.** Acetylation reaction: HPLC chromatograms

**Figure S27.** Expression analysis of selected RNA for keratinocytes (NHEK) from donor 1

**Figure S28.** Expression analysis of selected RNA for keratinocytes (NHEK) from donor 2

**Figure S29.** Expression analysis of selected RNA for keratinocytes (NHEK) from donor 3

**Figure S30.** Interannual variability study on *Ajuga pyramidalis* ethanolic extracts

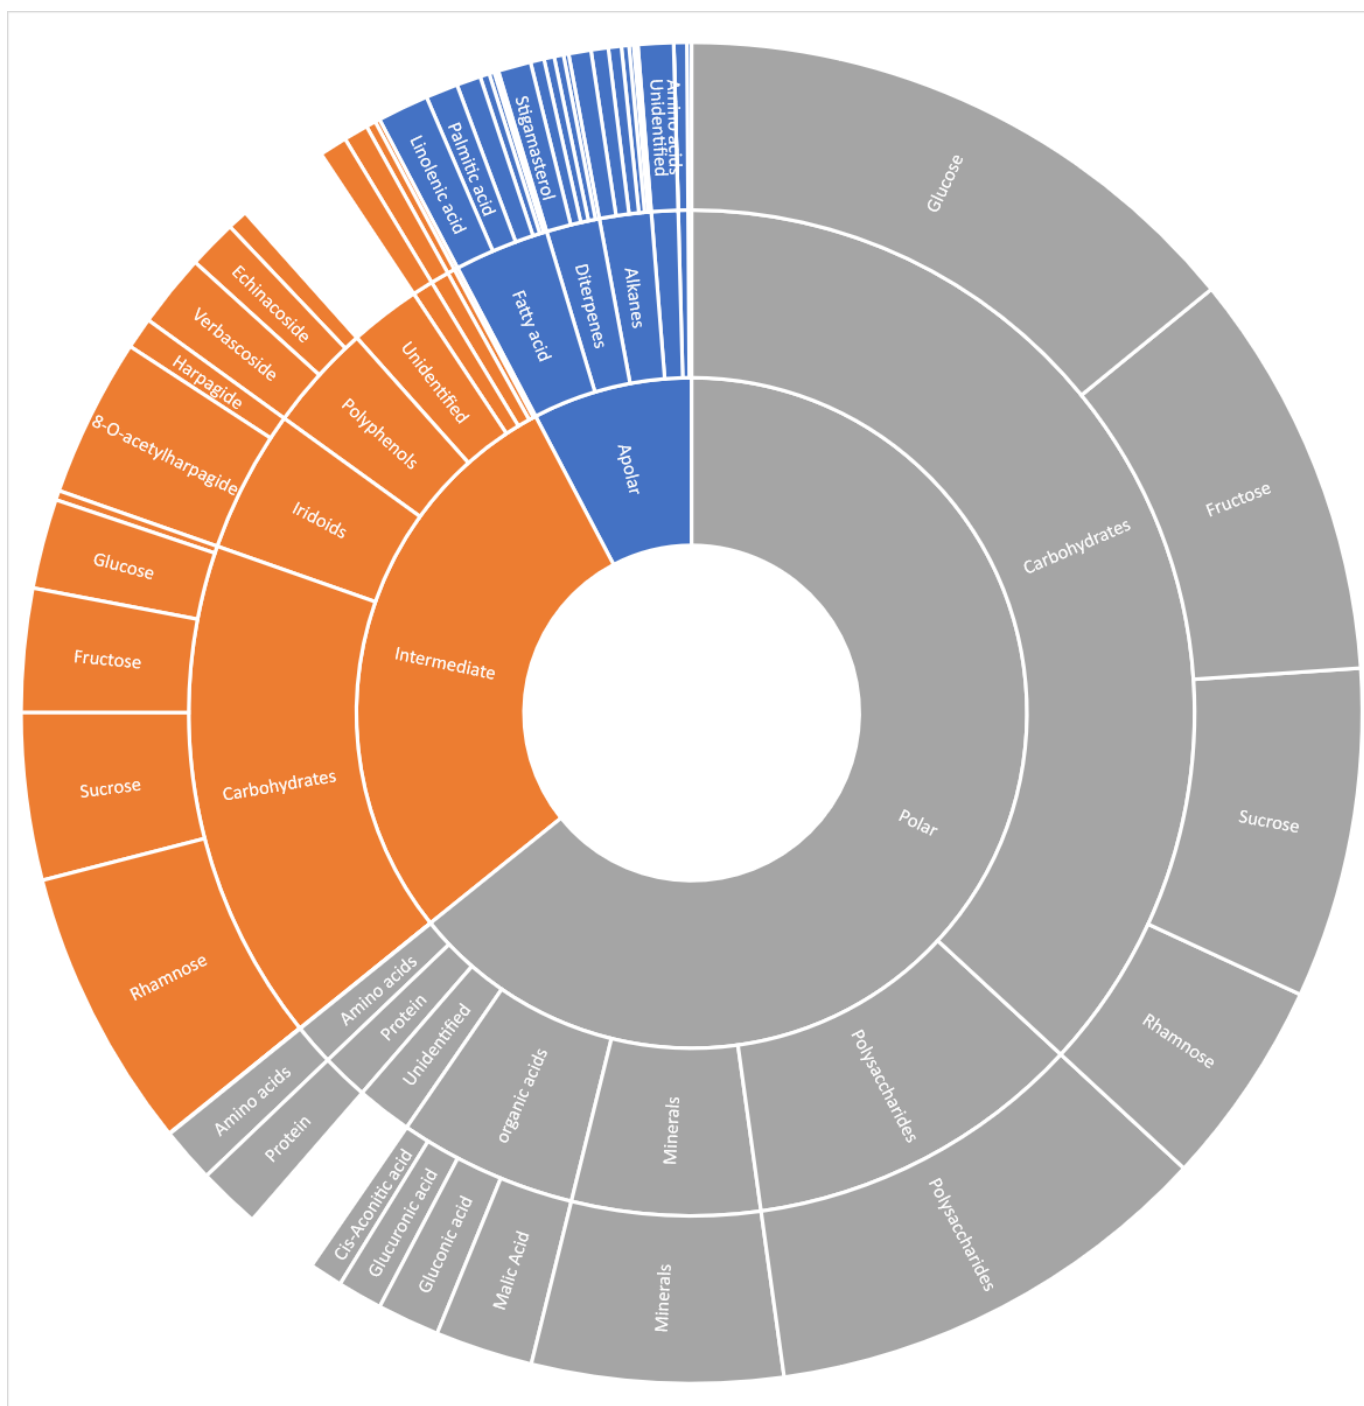

**Figure S1.** Global composition of the extracts of *A. pyramidalis* (in blue: the apolar extract, in orange: the intermediate extract and in grey: the polar extract).

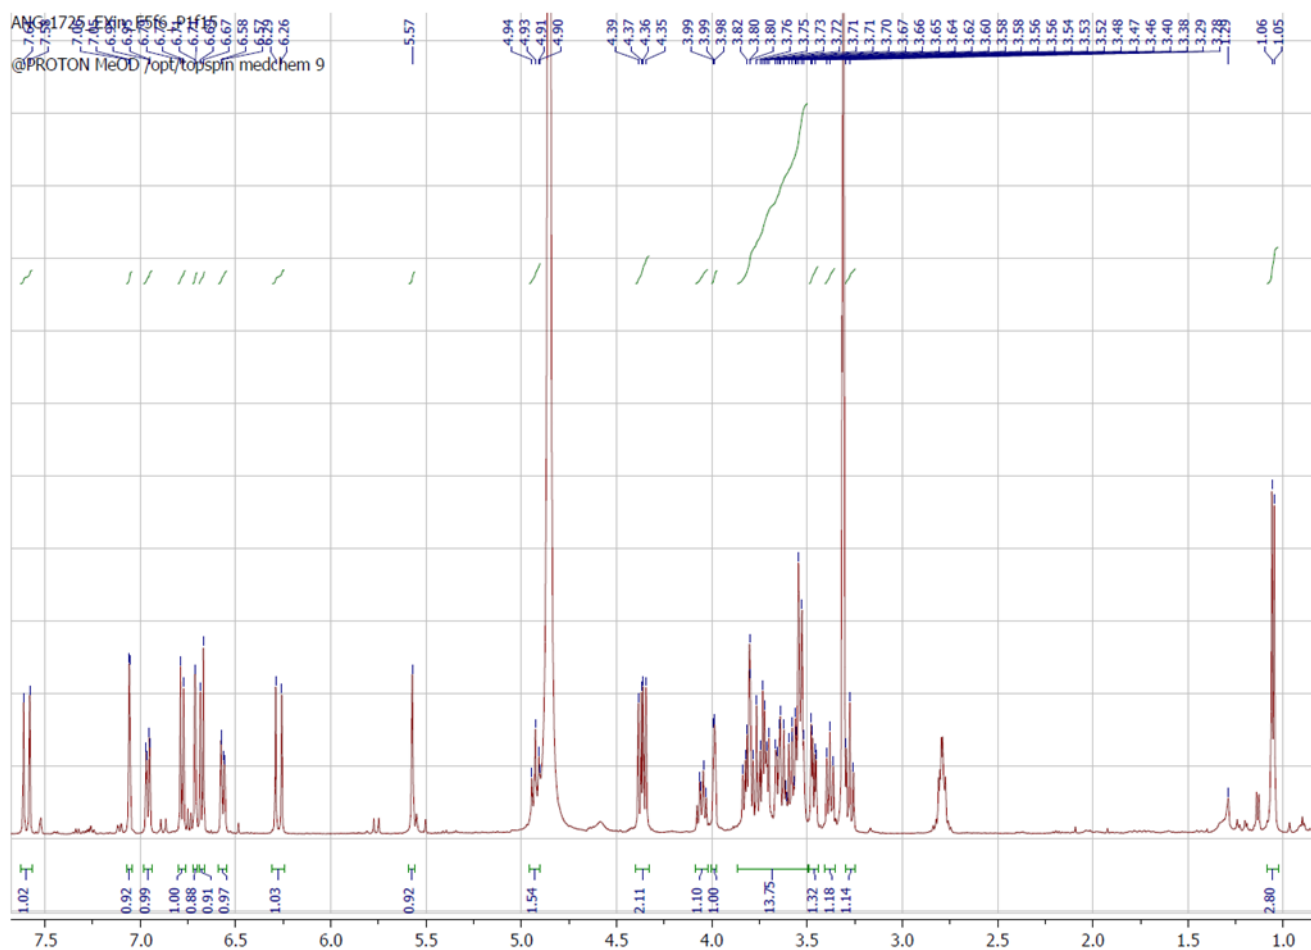

**Figure S2.**  $^1\text{H}$  NMR spectrum of echinacoside ( $\text{CD}_3\text{OD}$ , 500 MHz)

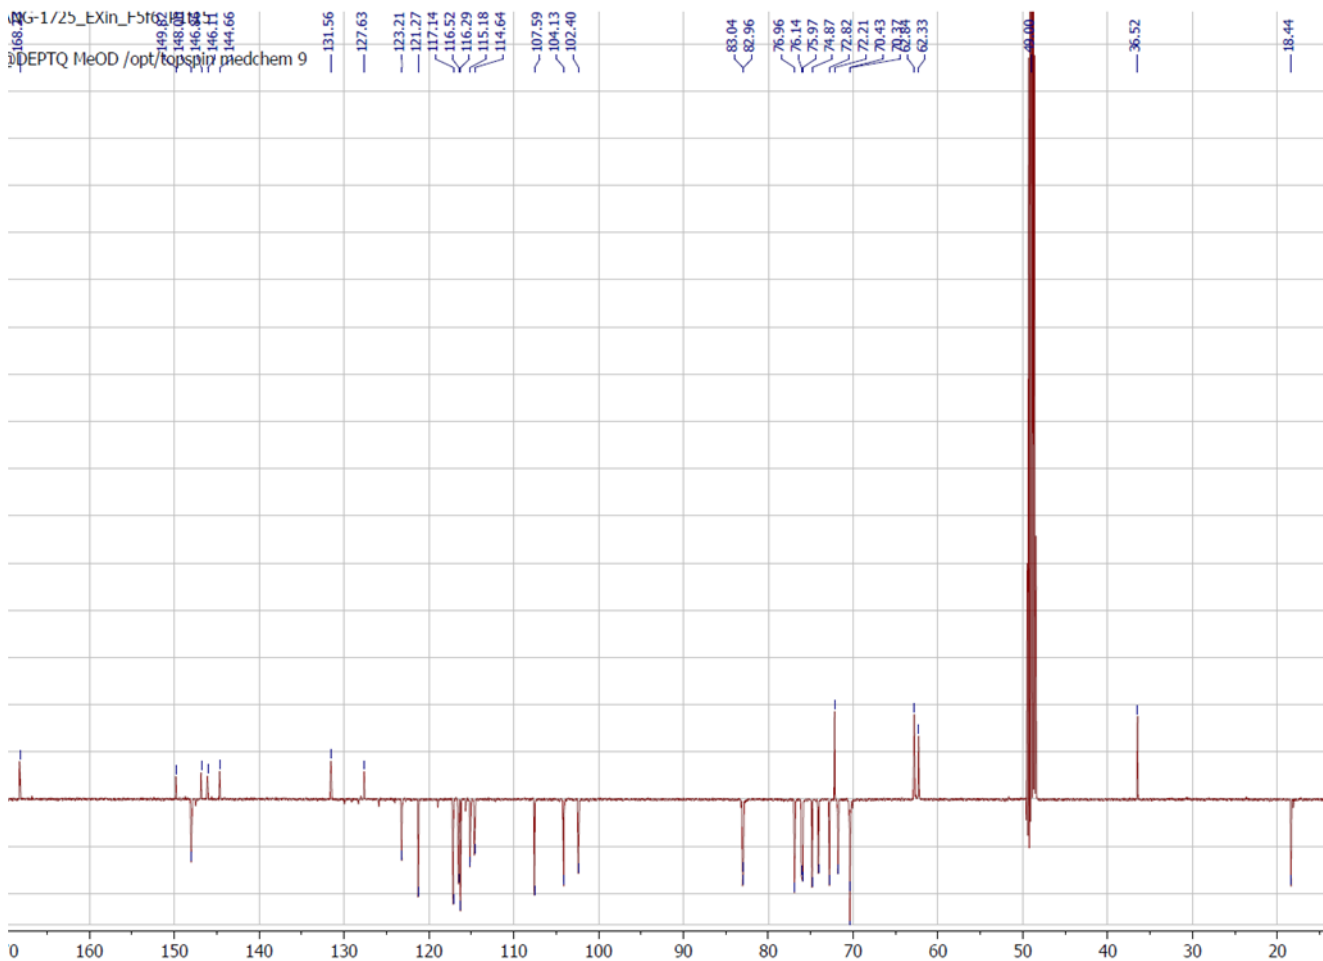

**Figure S3.**  $^{13}\text{C}$  NMR spectrum of echinacoside ( $\text{CD}_3\text{OD}$ , 125 MHz)

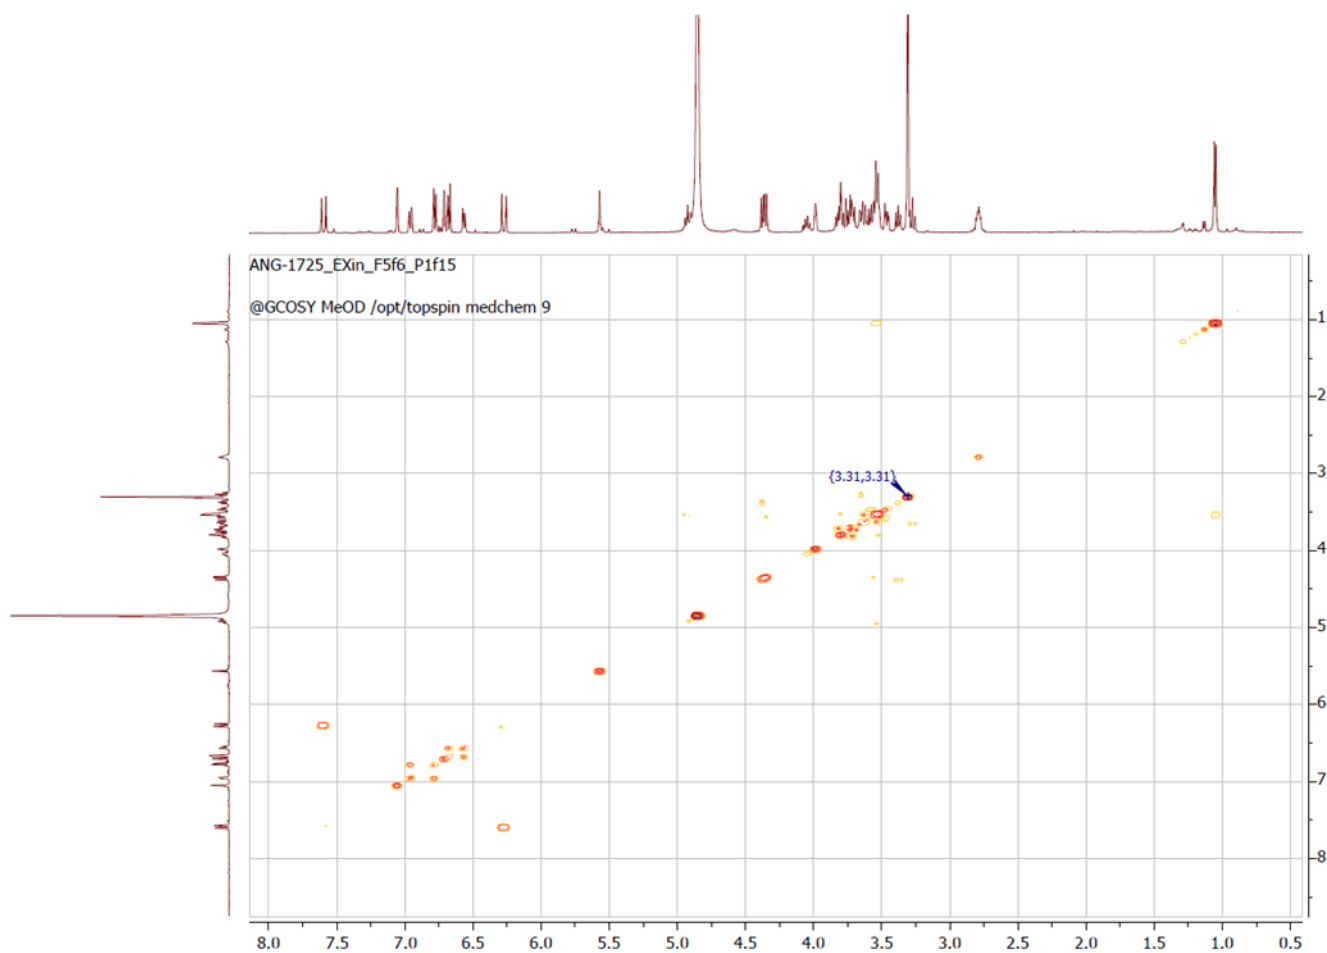

**Figure S4.** COSY spectrum of echinacoside ( $\text{CD}_3\text{OD}$ )

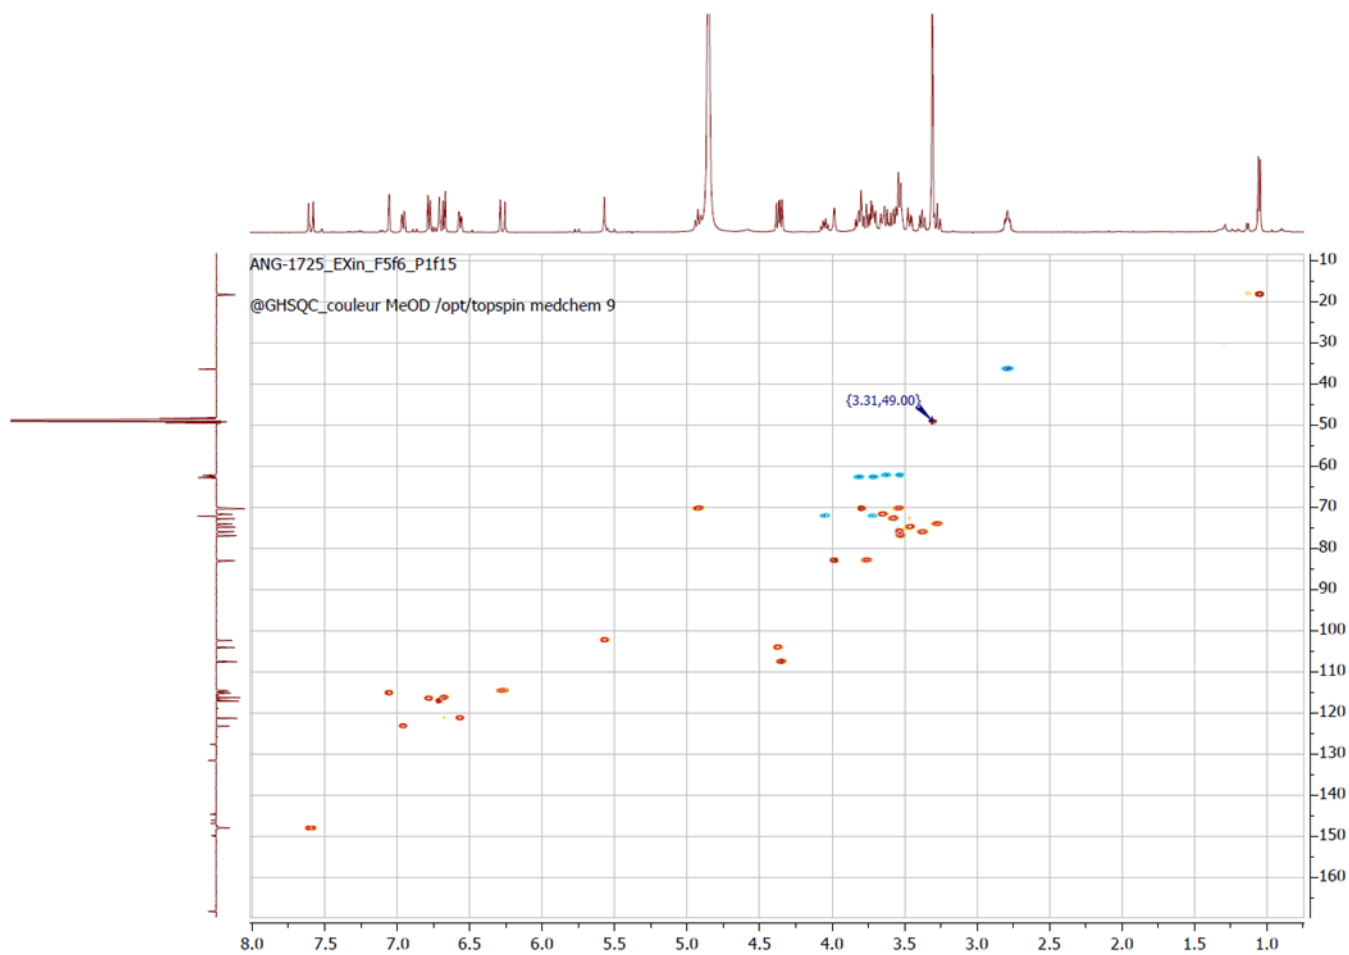

**Figure S5.** HSQC spectrum of echinacoside ( $\text{CD}_3\text{OD}$ )

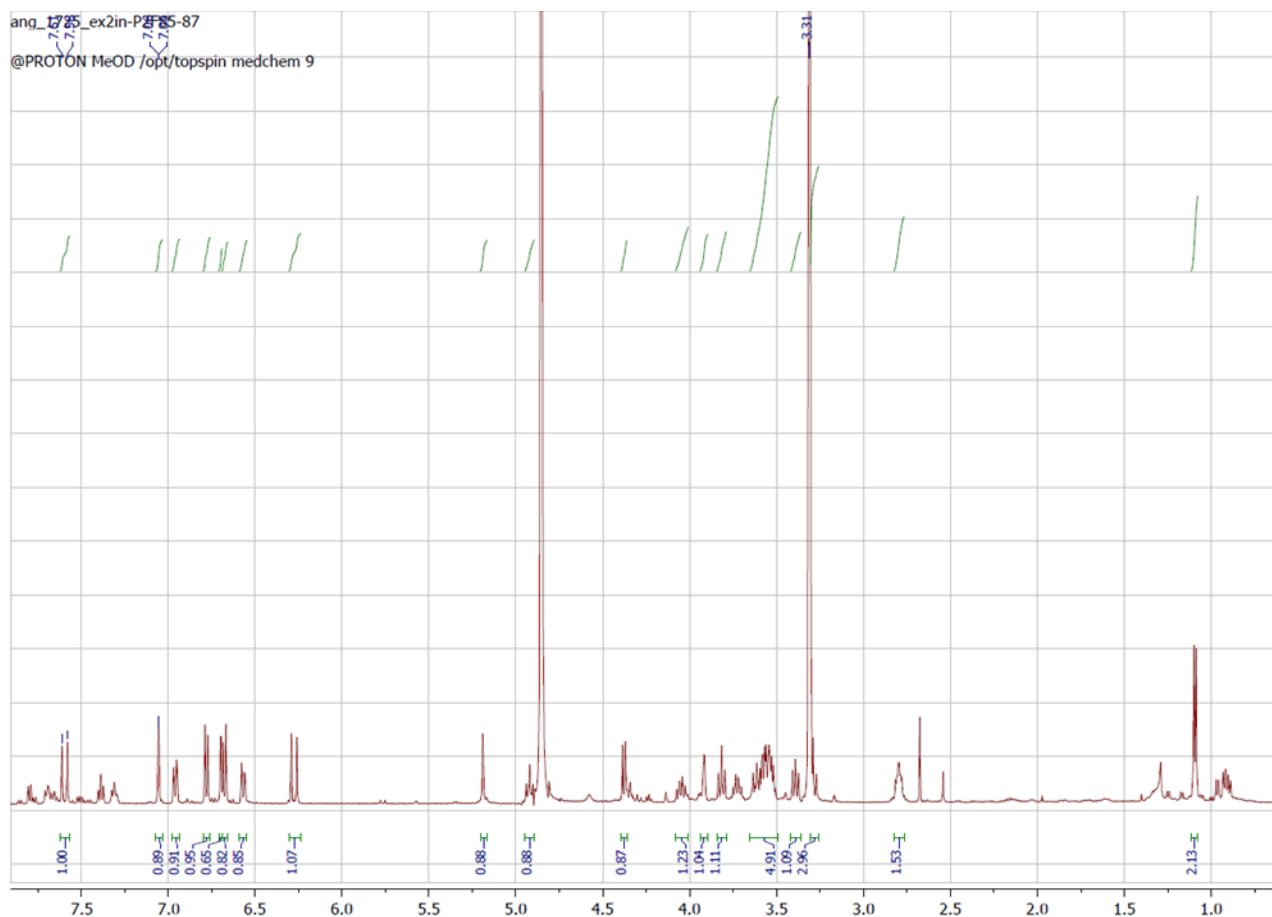

**Figure S6.**  $^1\text{H}$  NMR spectrum of verbascoside ( $\text{CD}_3\text{OD}$ , 500 MHz)

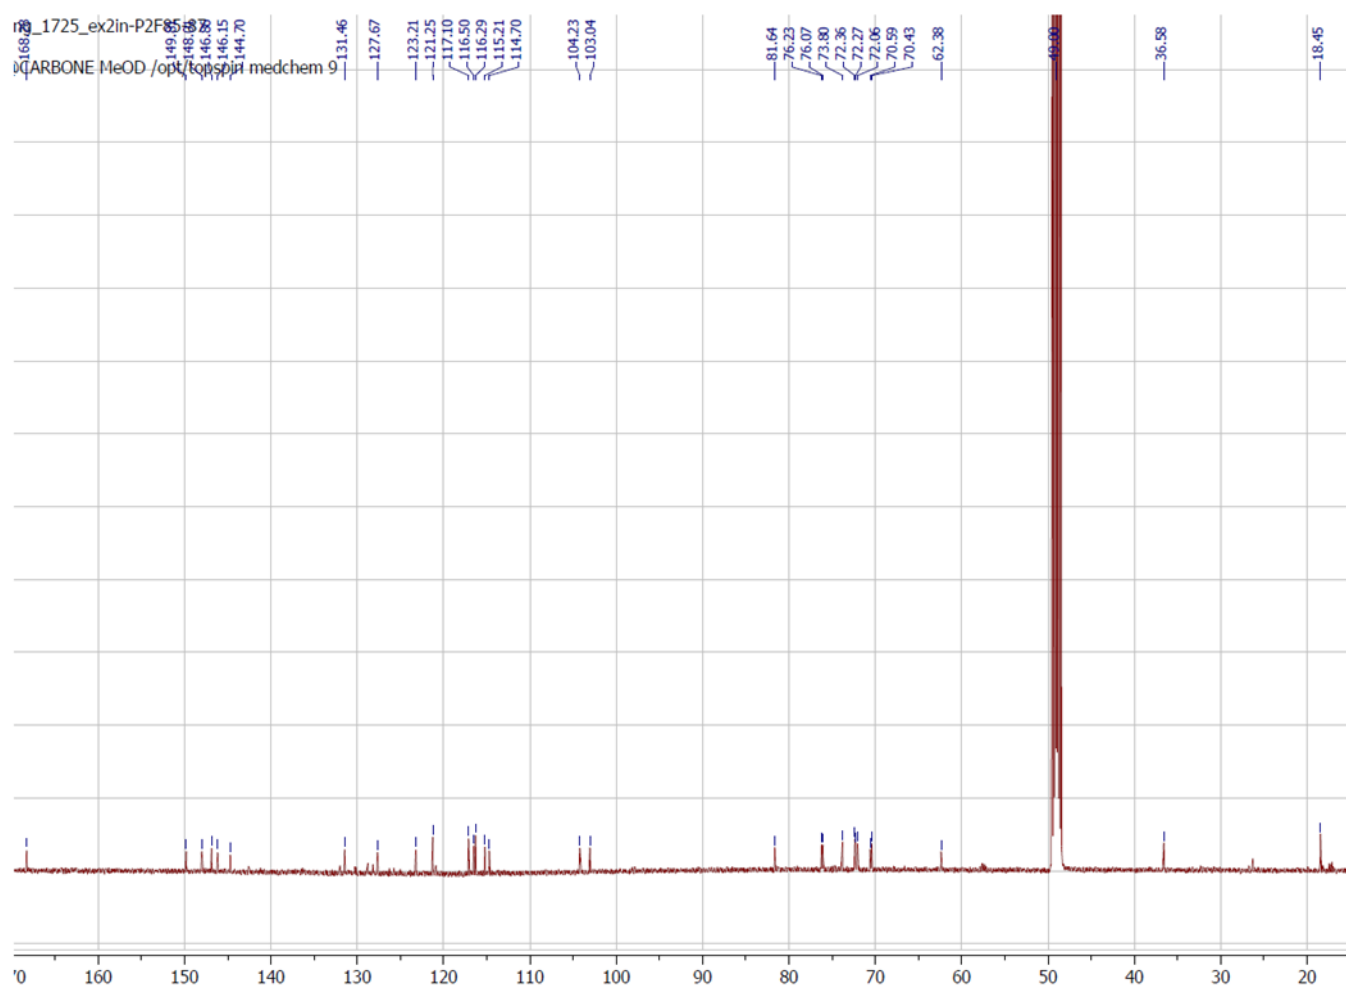

**Figure S7.**  $^{13}\text{C}$  NMR spectrum of verbascoside ( $\text{CD}_3\text{OD}$ , 125 MHz)

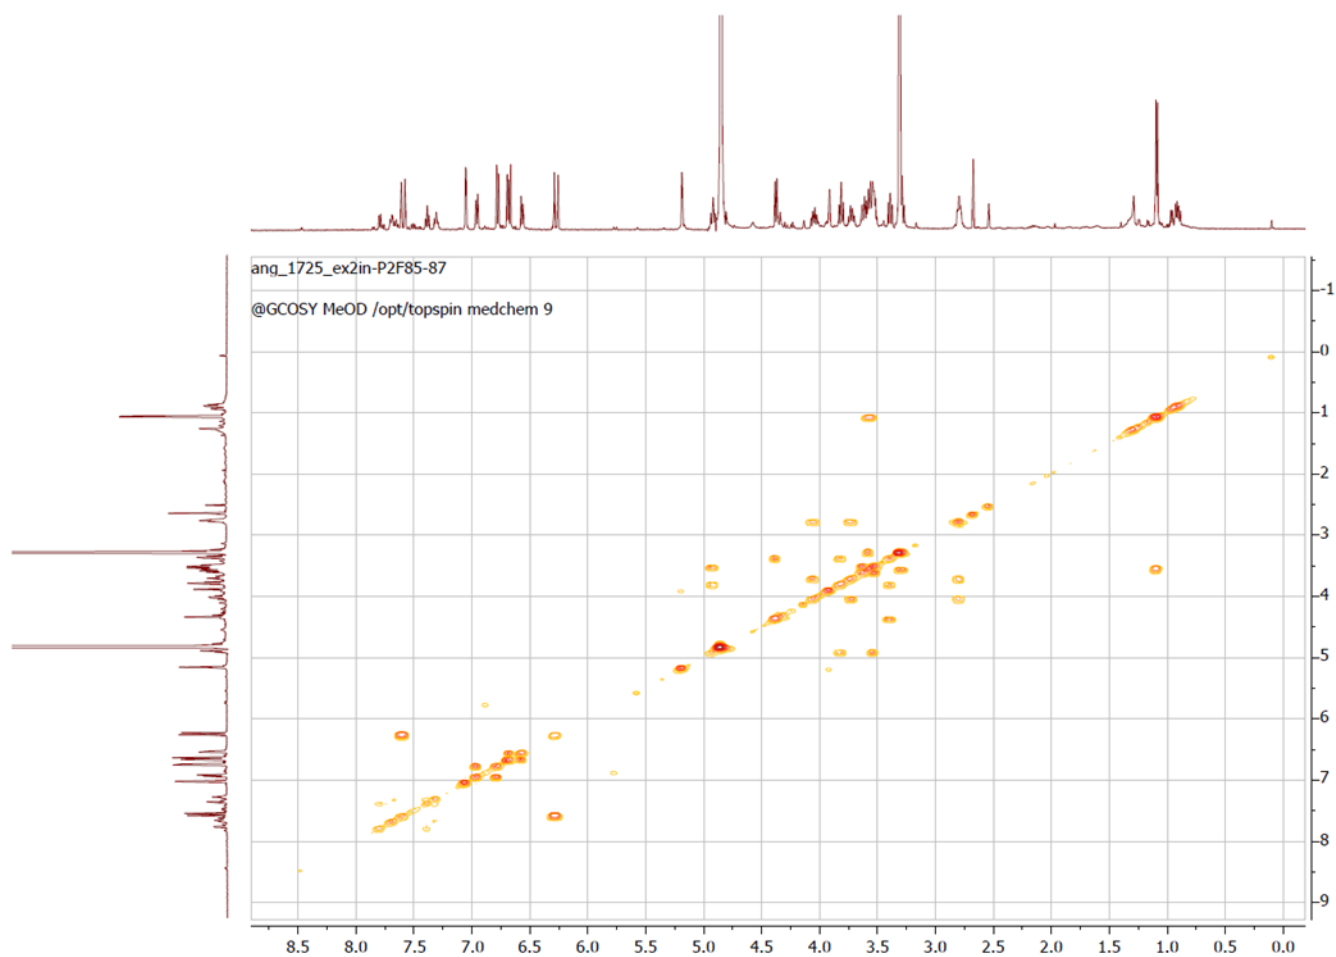

**Figure S8.** COSY spectrum of verbascoside (CD<sub>3</sub>OD)

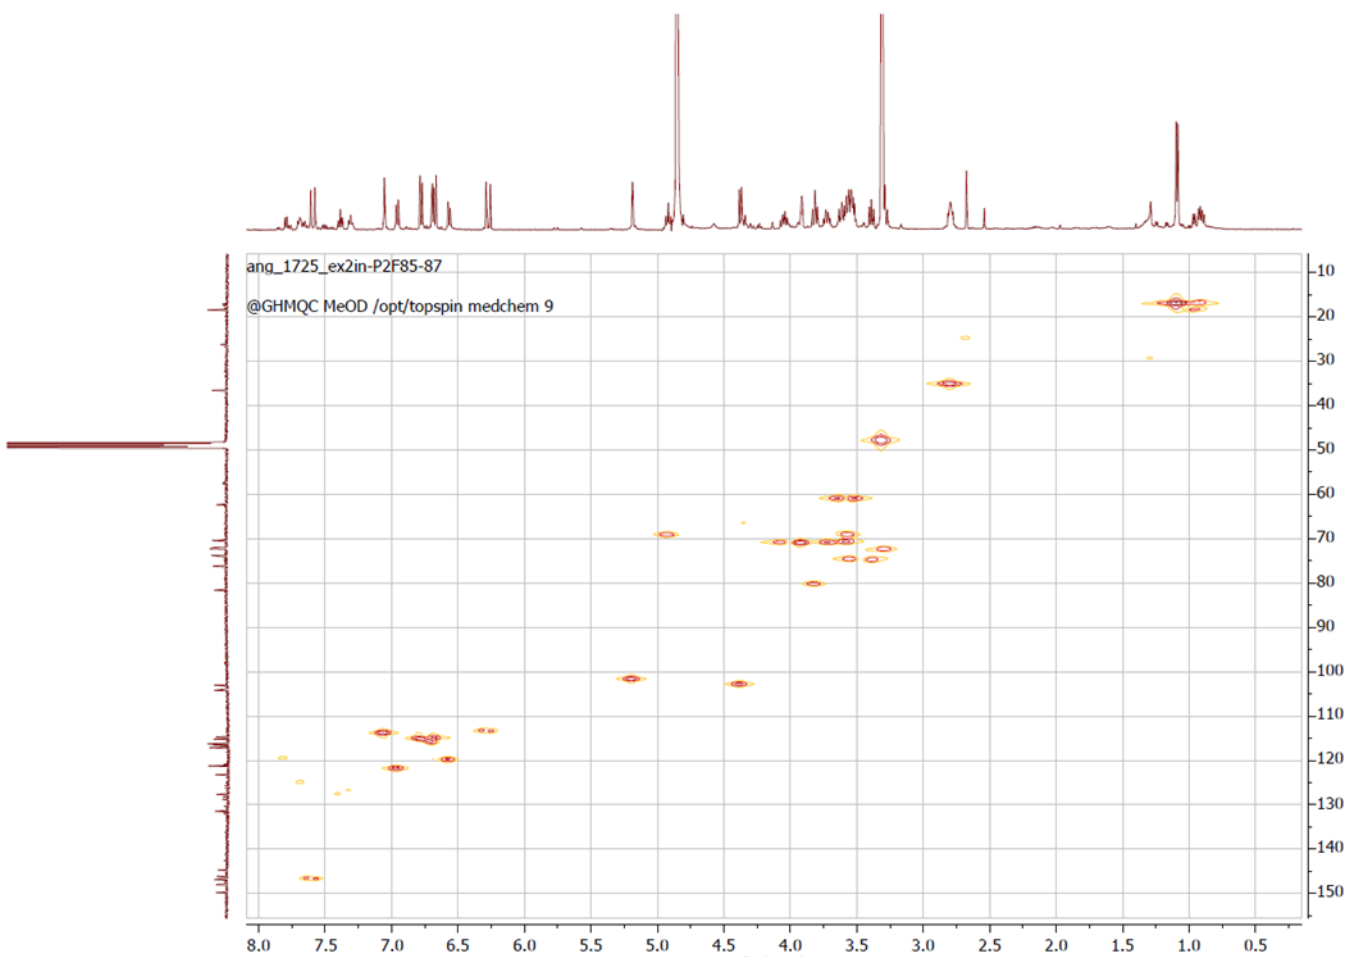

**Figure S9.** HSQC spectrum of verbascoside (CD<sub>3</sub>OD)

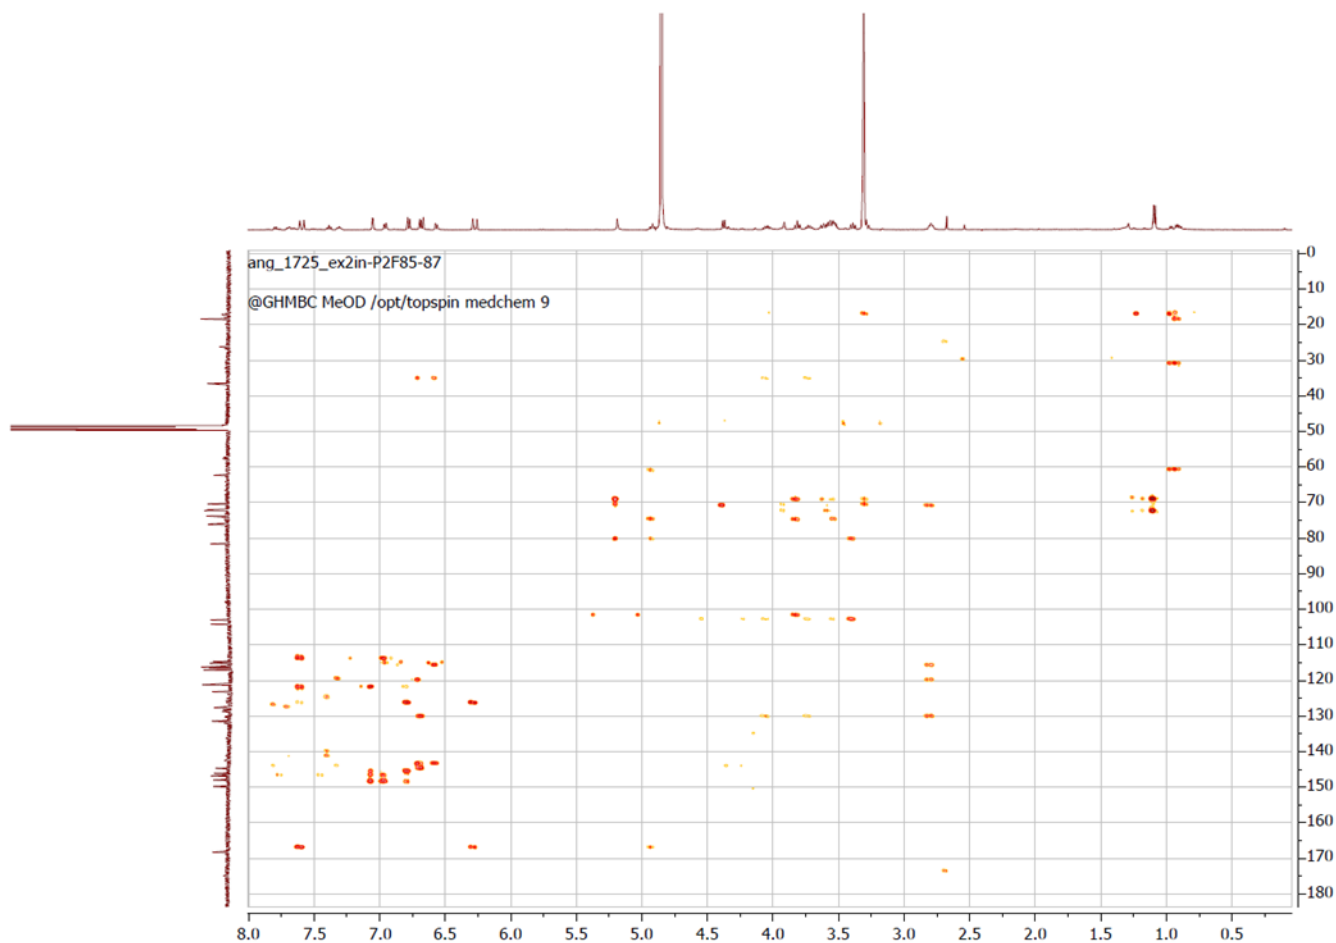

**Figure S10.** HMBC spectrum of verbascoside ( $\text{CD}_3\text{OD}$ )

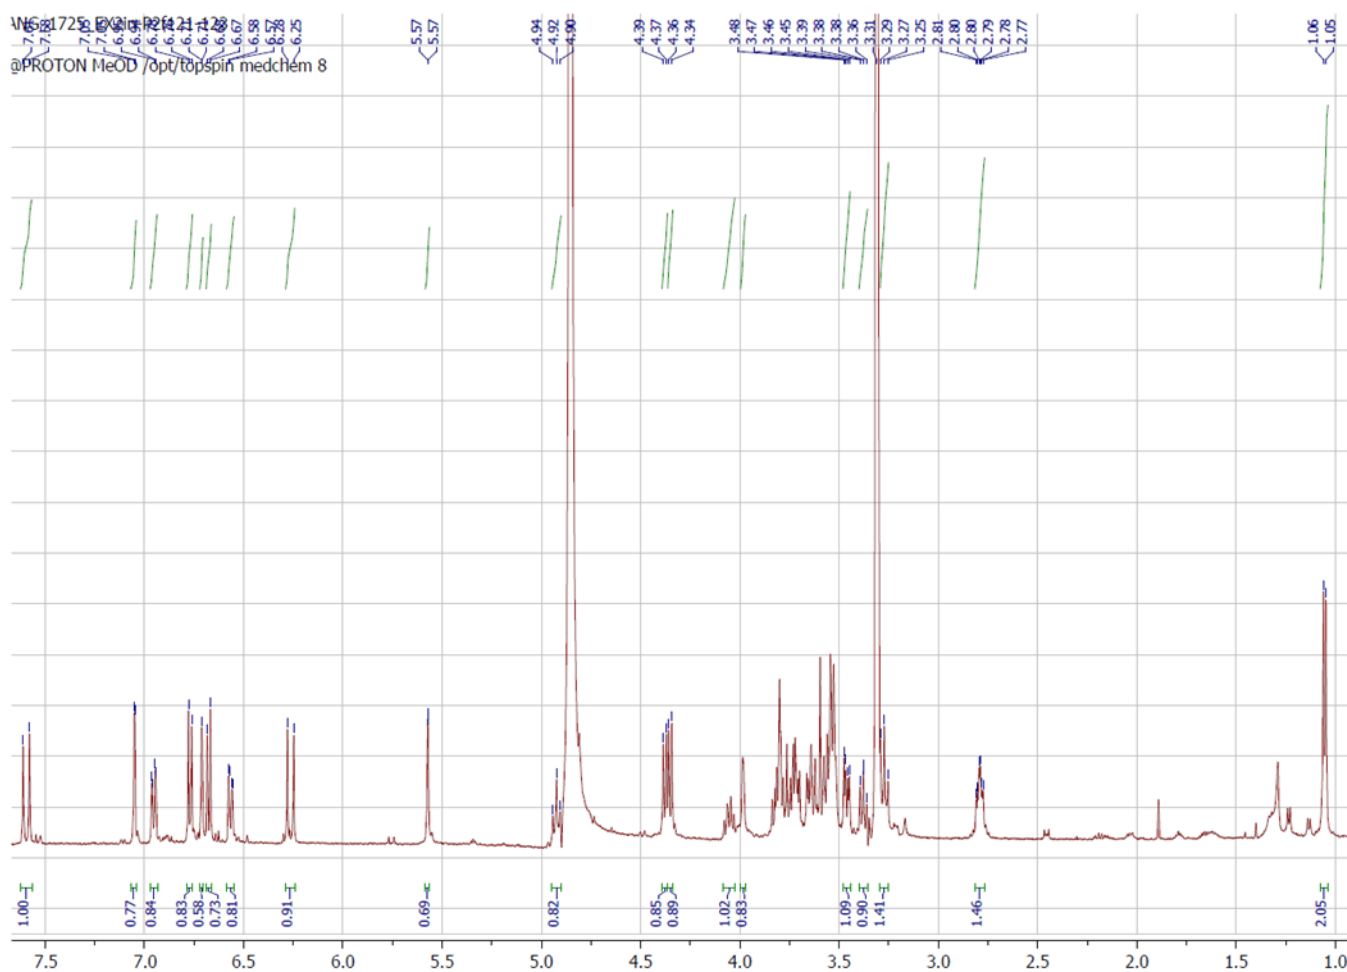

**Figure S11.**  $^1\text{H}$  NMR spectrum of teupolioside ( $\text{CD}_3\text{OD}$ , 500 MHz)

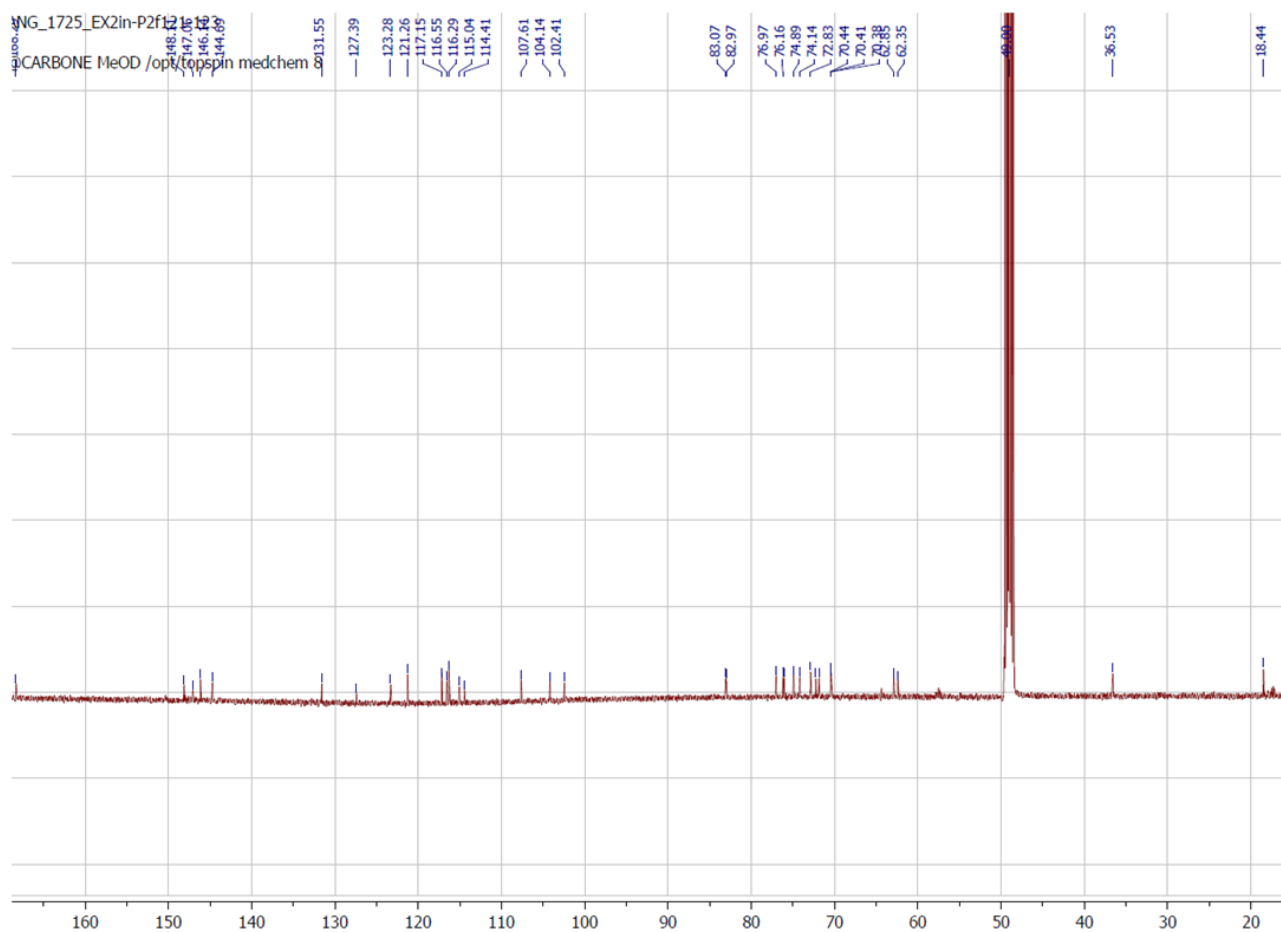

**Figure S12.**  $^{13}\text{C}$  NMR spectrum of teupolioside ( $\text{CD}_3\text{OD}$ , 125 MHz)

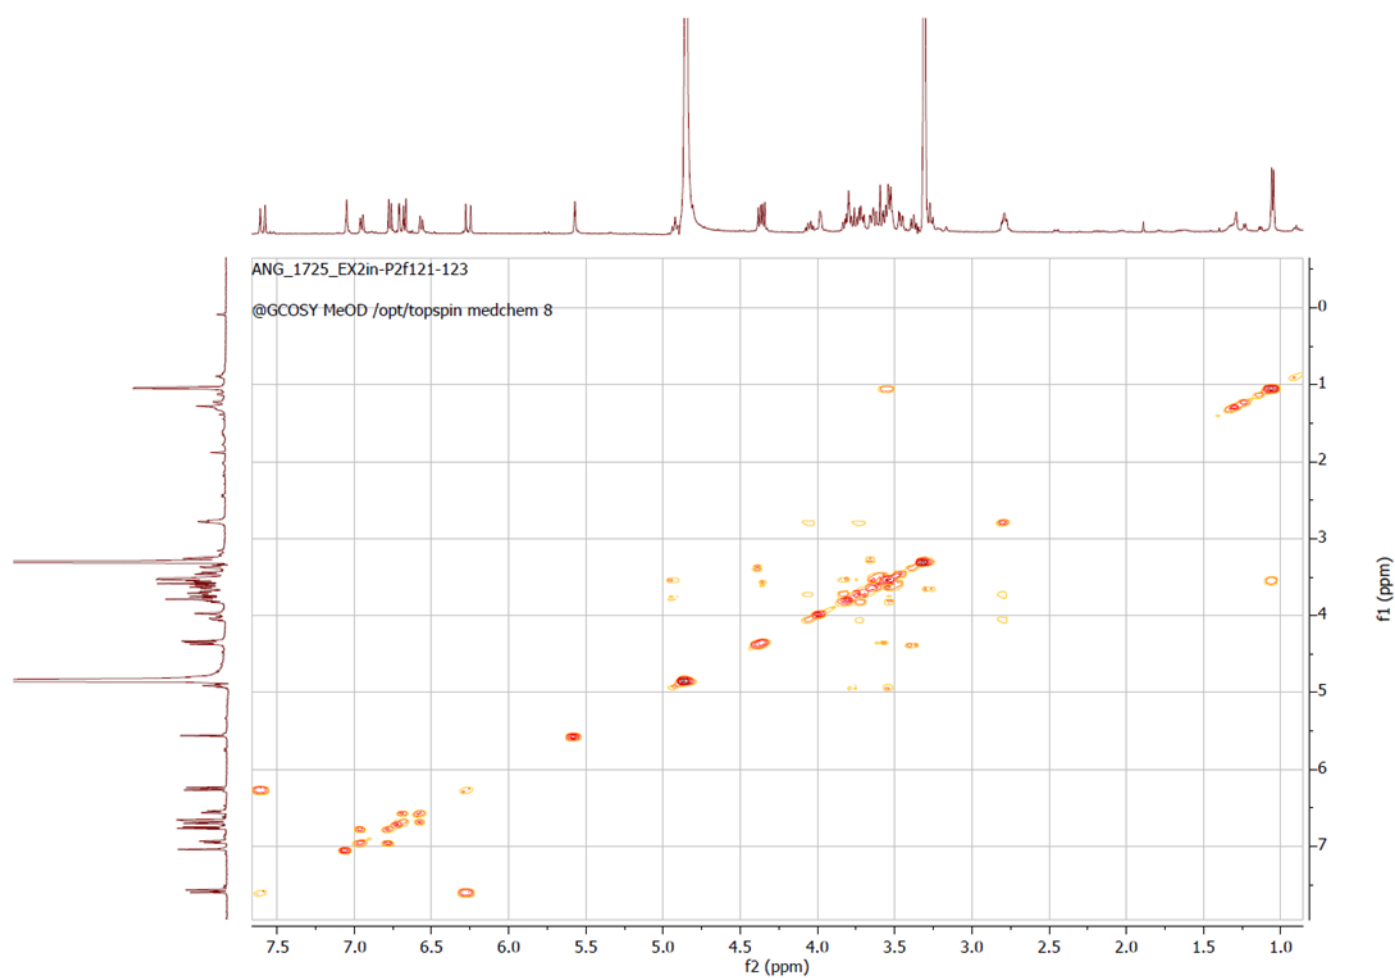

**Figure S13.** COSY spectrum of teupolioside ( $\text{CD}_3\text{OD}$ )

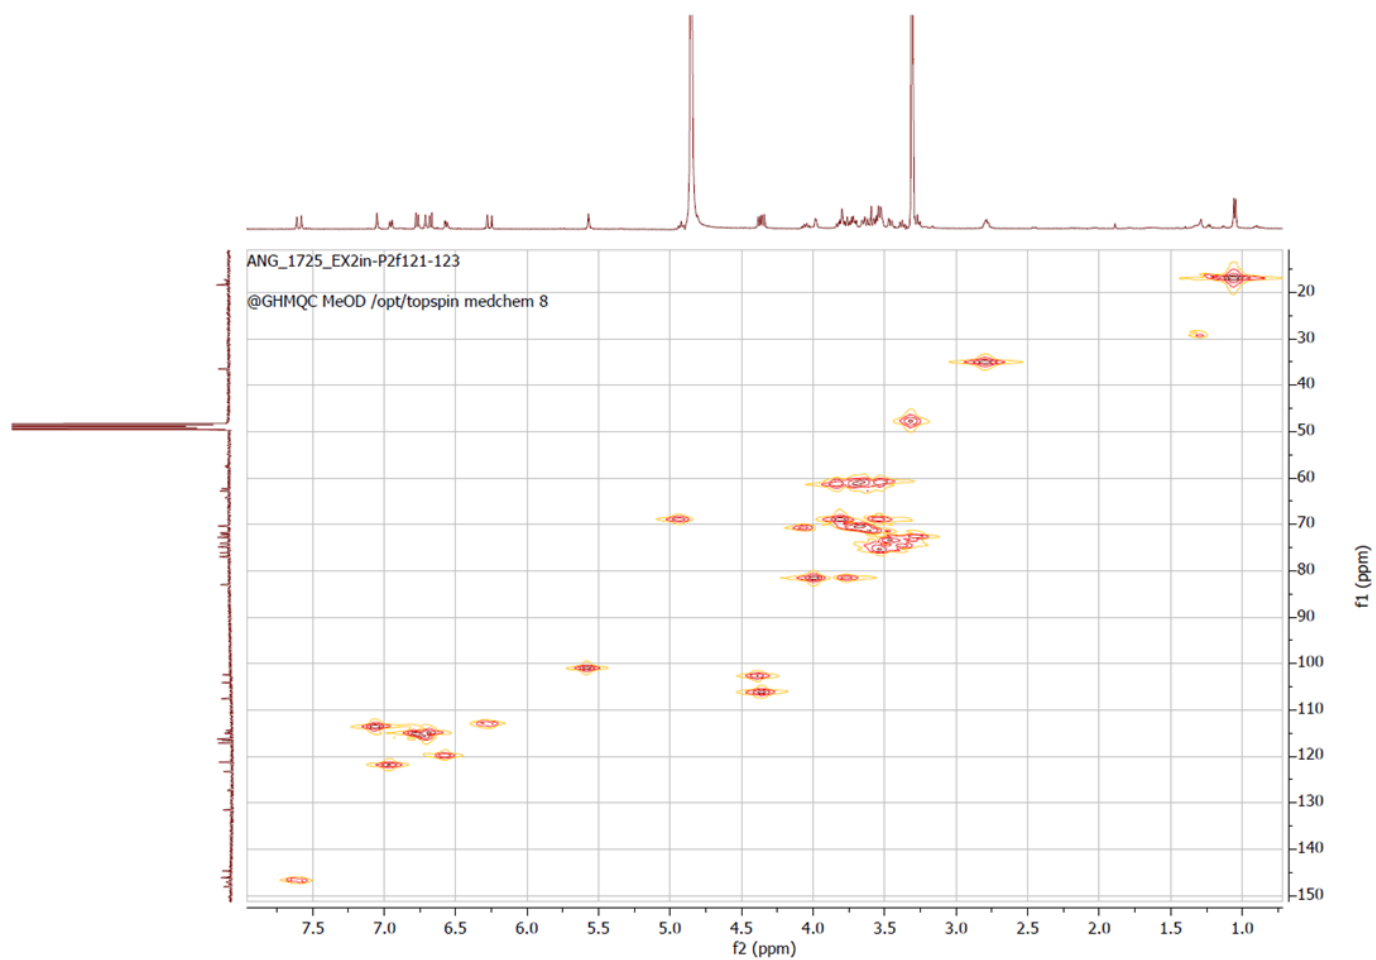

**Figure S14.** HSQC spectrum of teupolioside (CD<sub>3</sub>OD)

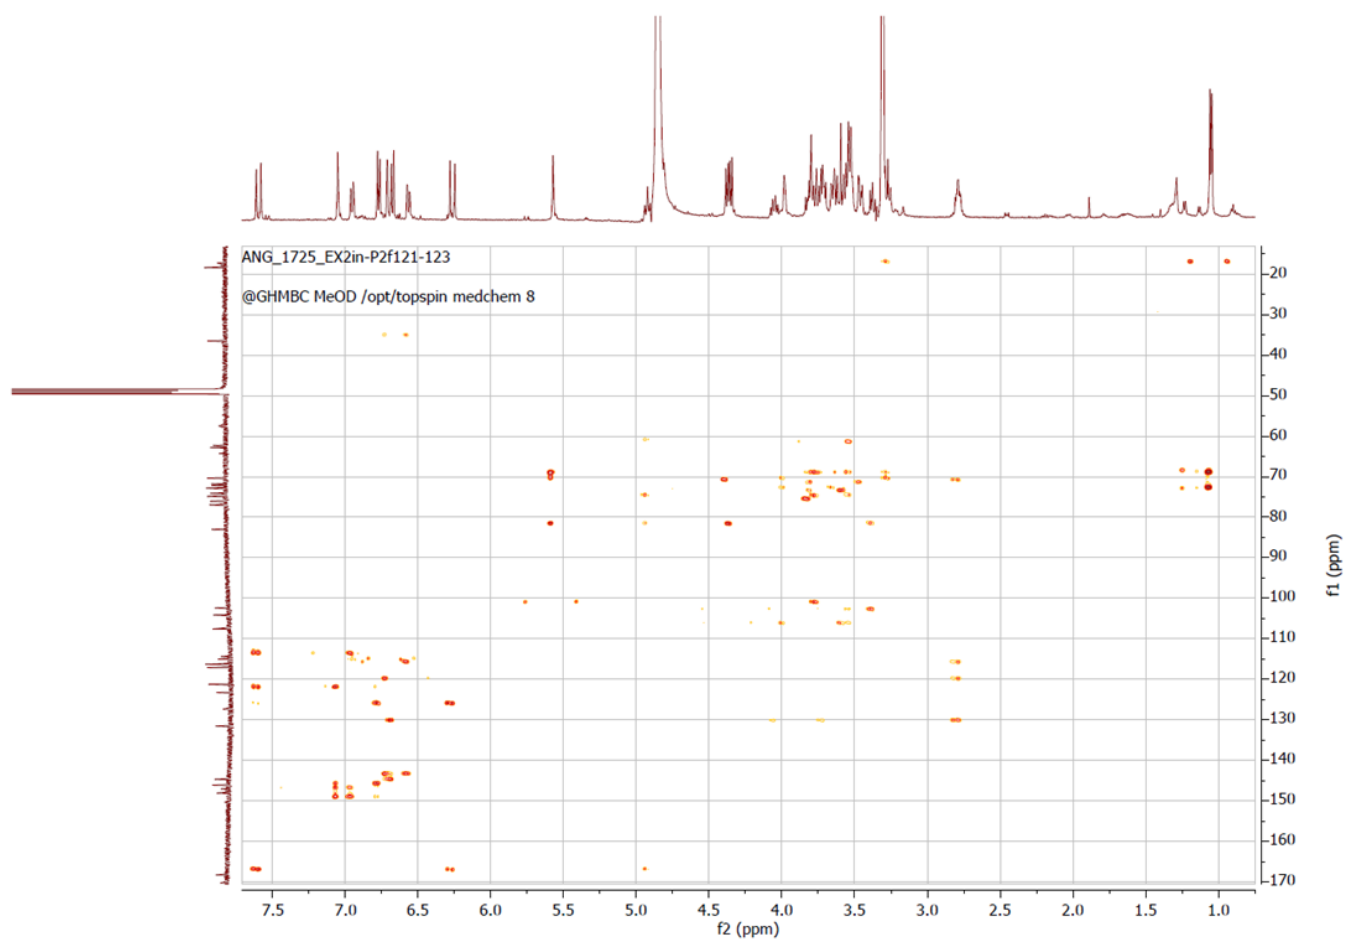

**Figure S15.** HMBC spectrum of teupolioside (CD<sub>3</sub>OD)

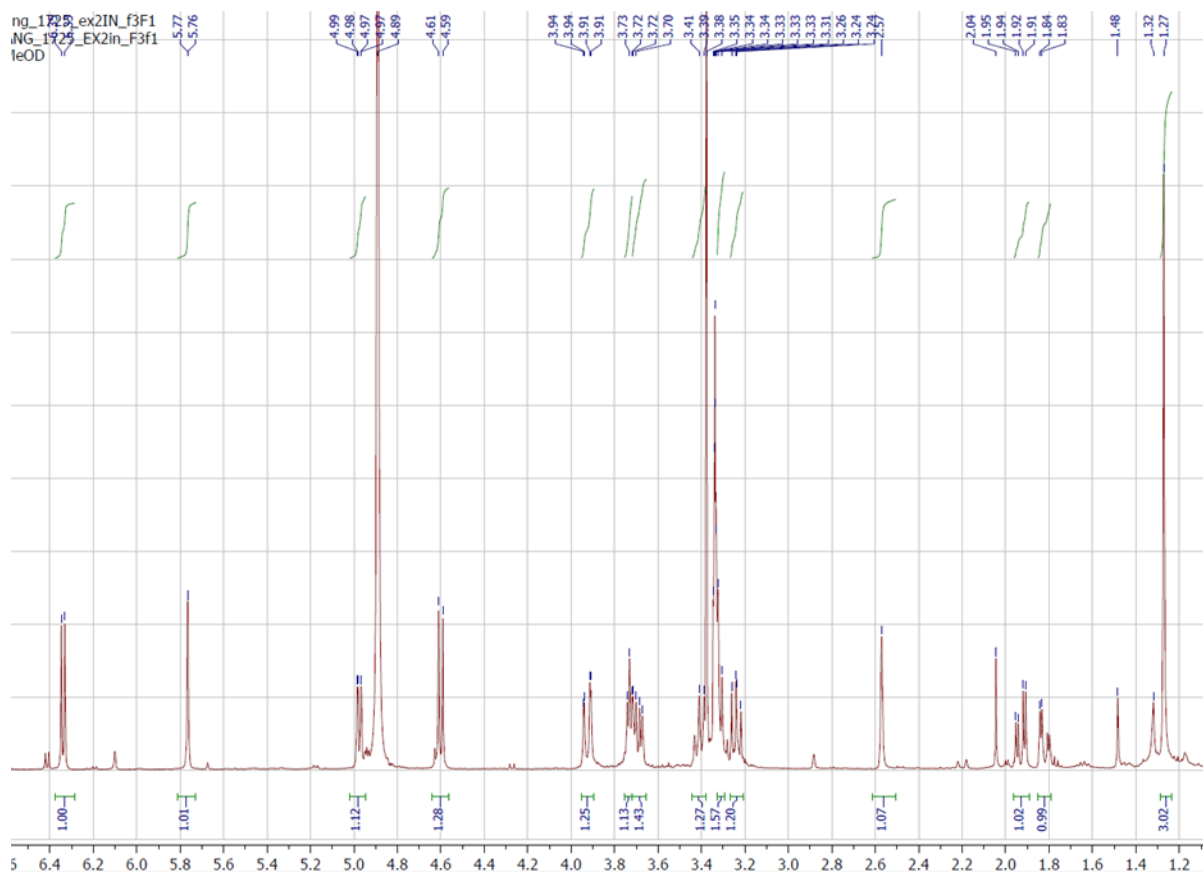

**Figure S16.**  $^1\text{H}$  NMR spectrum of harpagide ( $\text{CD}_3\text{OD}$ , 400 MHz)

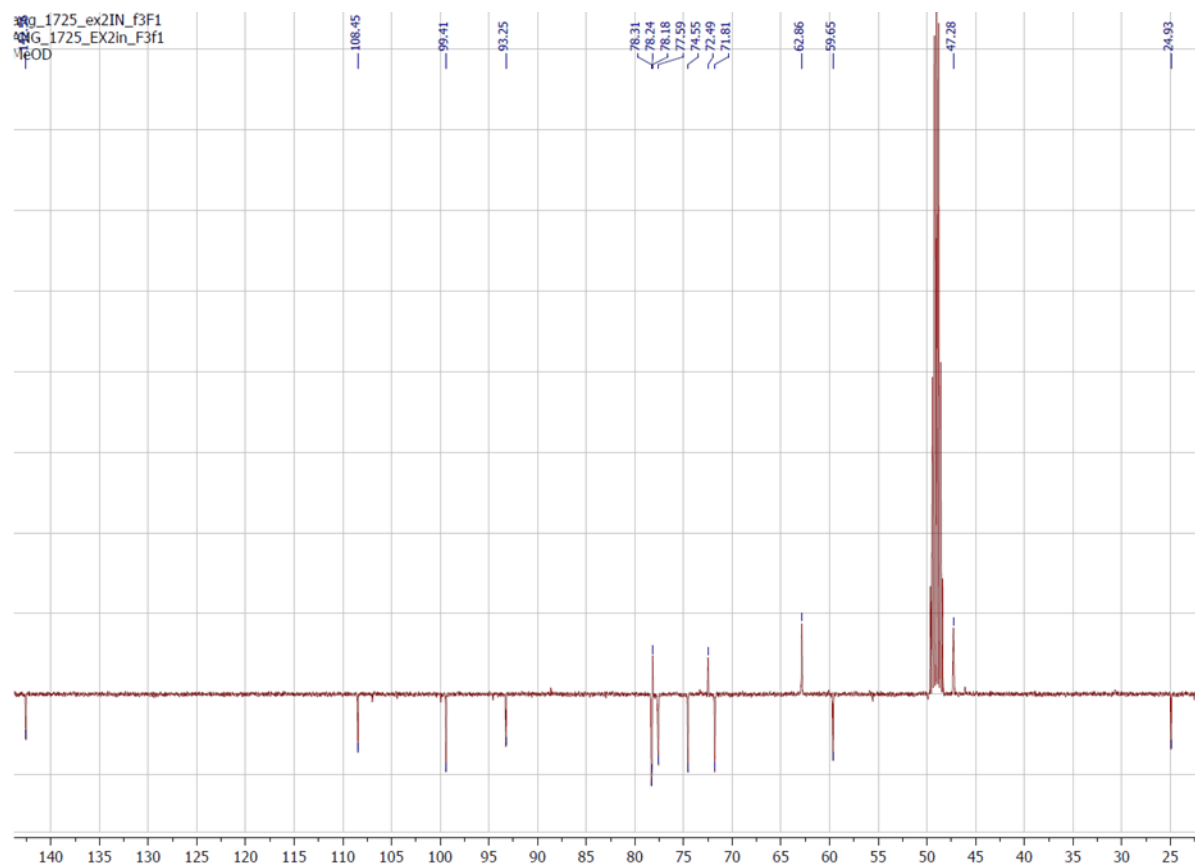

**Figure S17.**  $^{13}\text{C}$  NMR spectrum of harpagide ( $\text{CD}_3\text{OD}$ , 100 MHz)

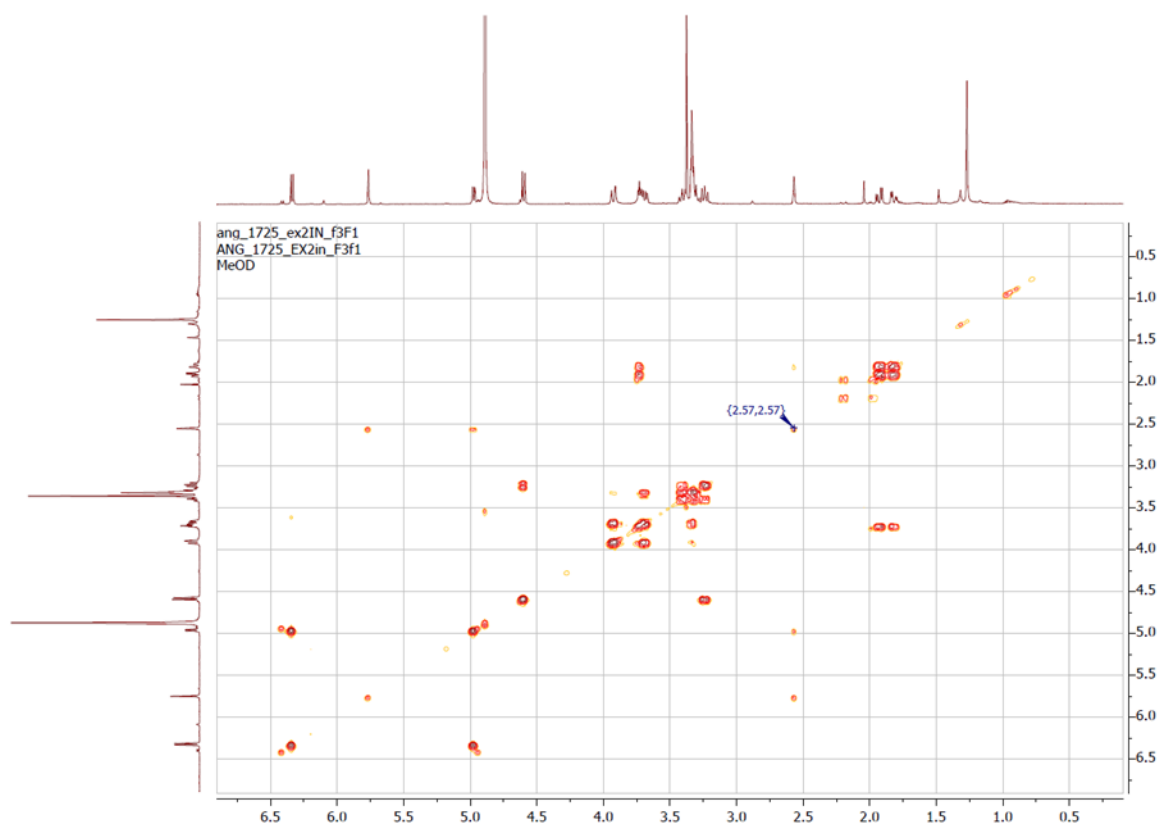

**Figure S18.** COSY spectrum of harpagide ( $\text{CD}_3\text{OD}$ )

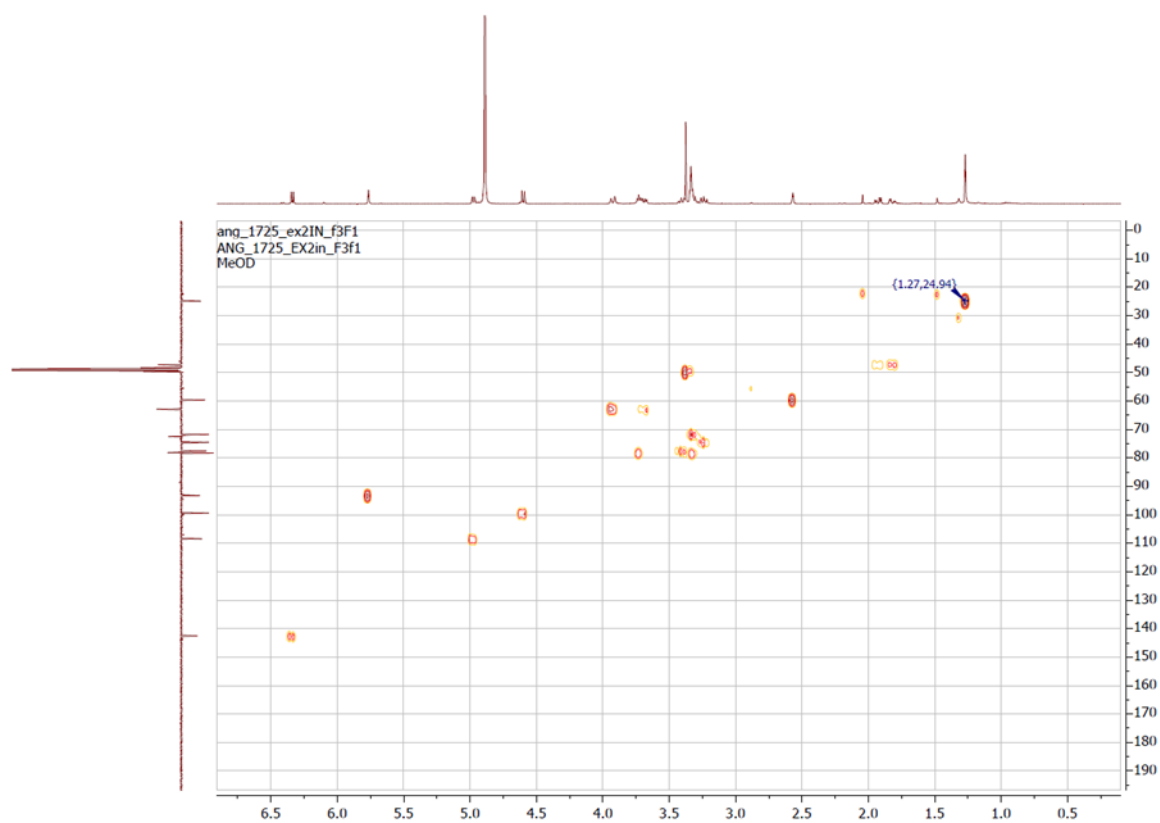

**Figure S19.** HSQC spectrum of harpagide ( $\text{CD}_3\text{OD}$ )

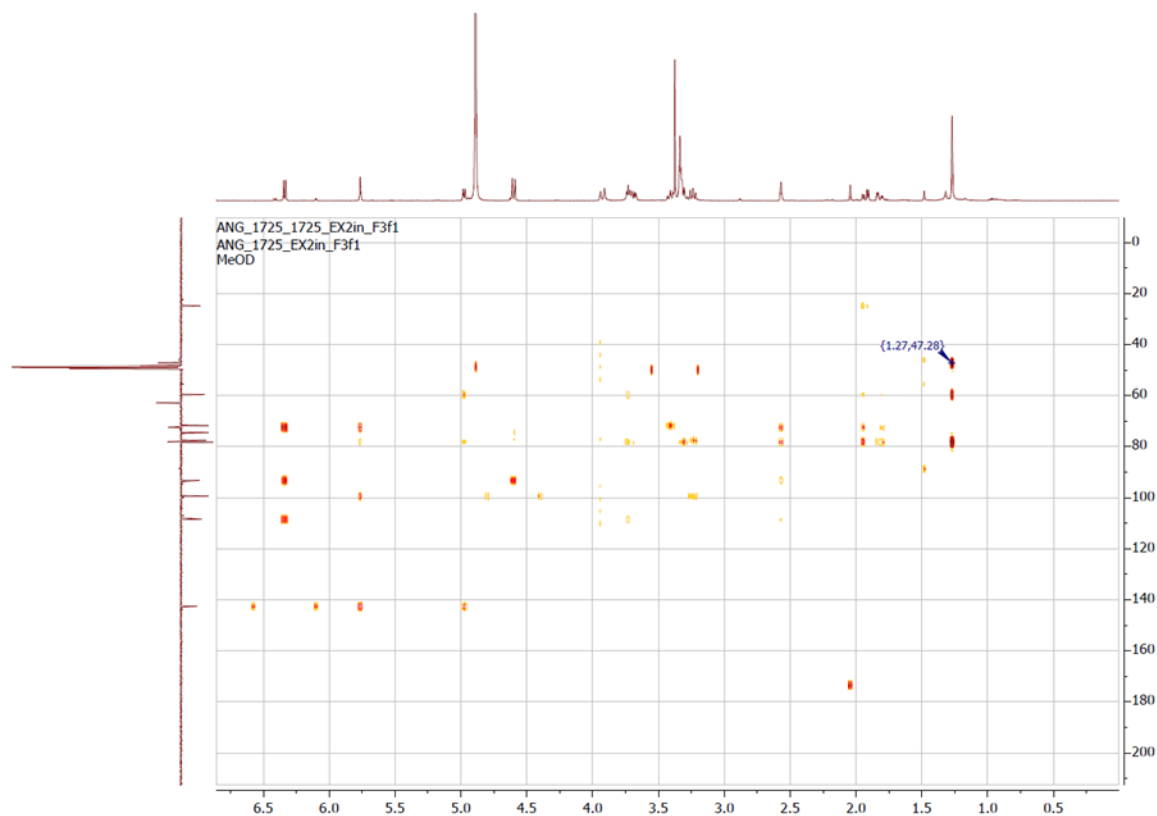

**Figure S20.** HMBC spectrum of harpagide ( $\text{CD}_3\text{OD}$ )

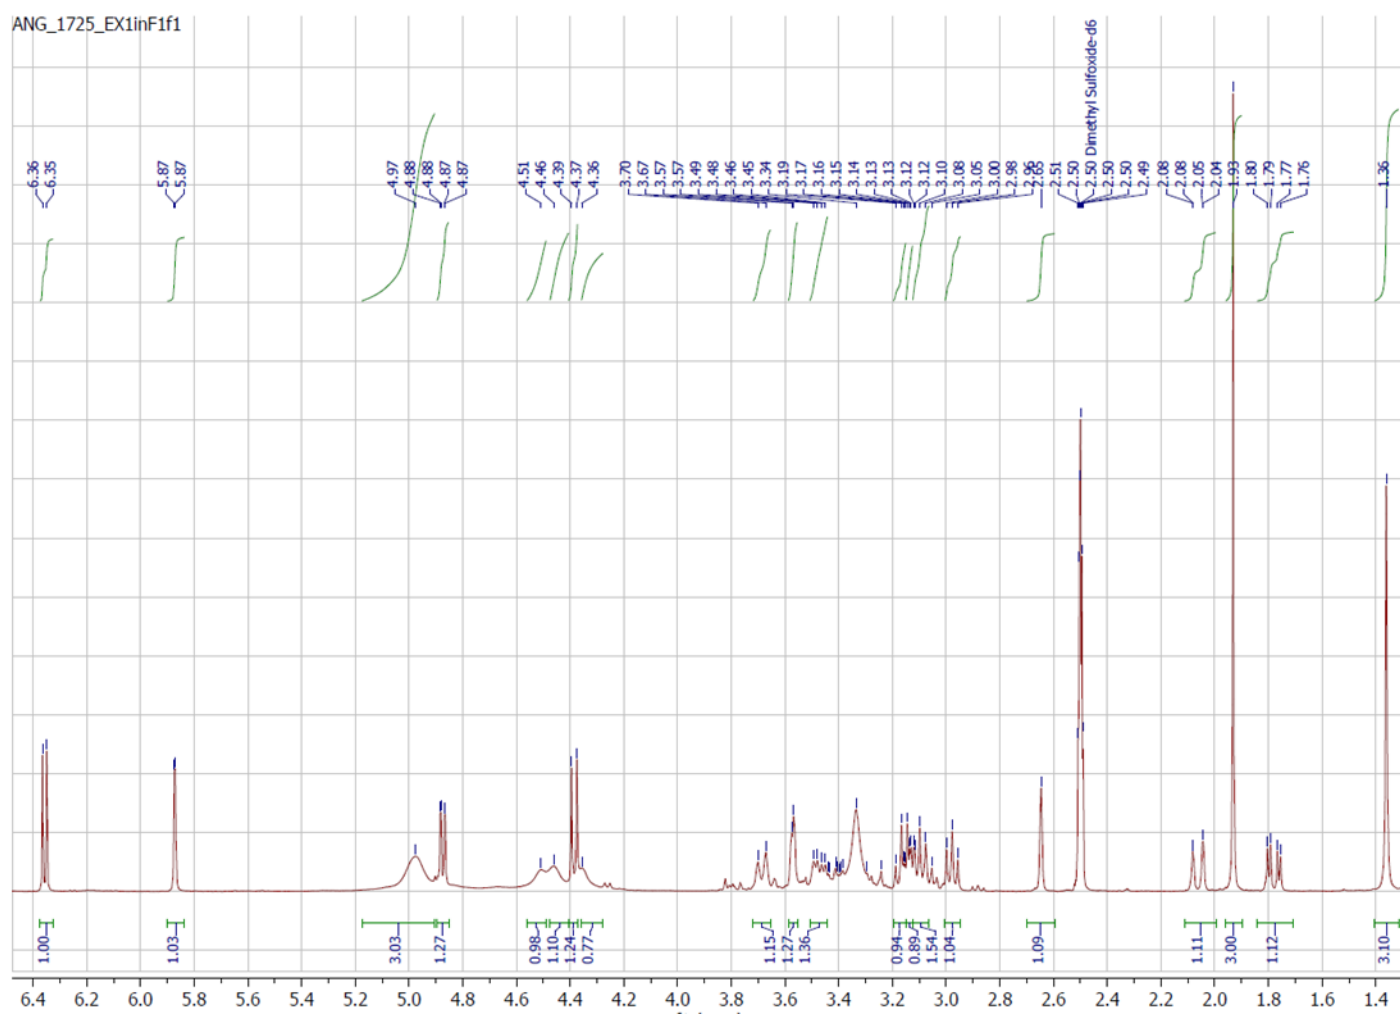

**Figure S21.**  $^1\text{H}$  NMR spectrum of 8-*O*-acetylharpagide ( $\text{DMSO}-d_6$ , 400 MHz)

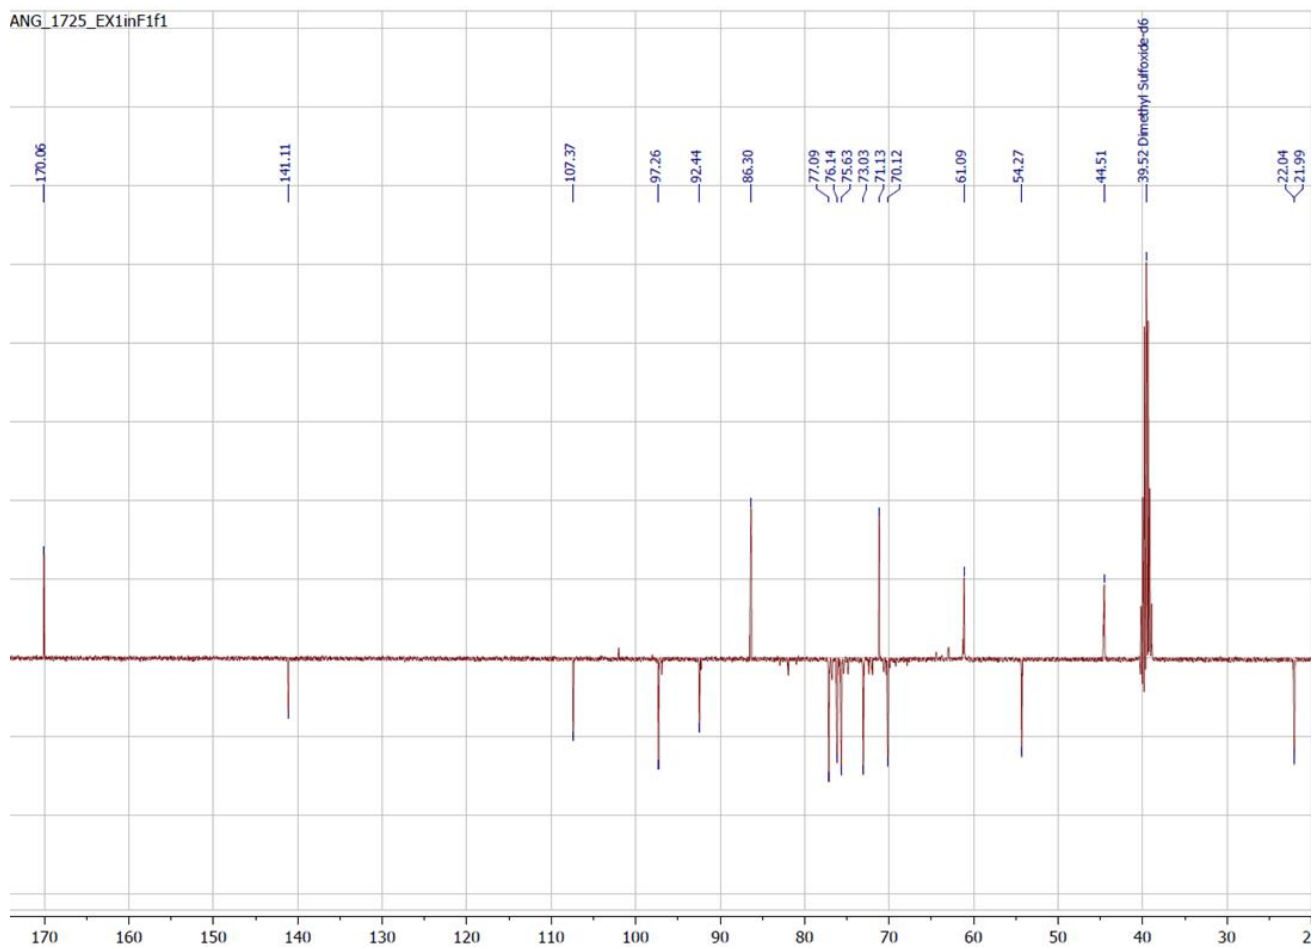

**Figure S22.**  $^{13}\text{C}$  NMR spectrum of 8-*O*-acetylharpagide ( $\text{DMSO}-d_6$ , 100 MHz)

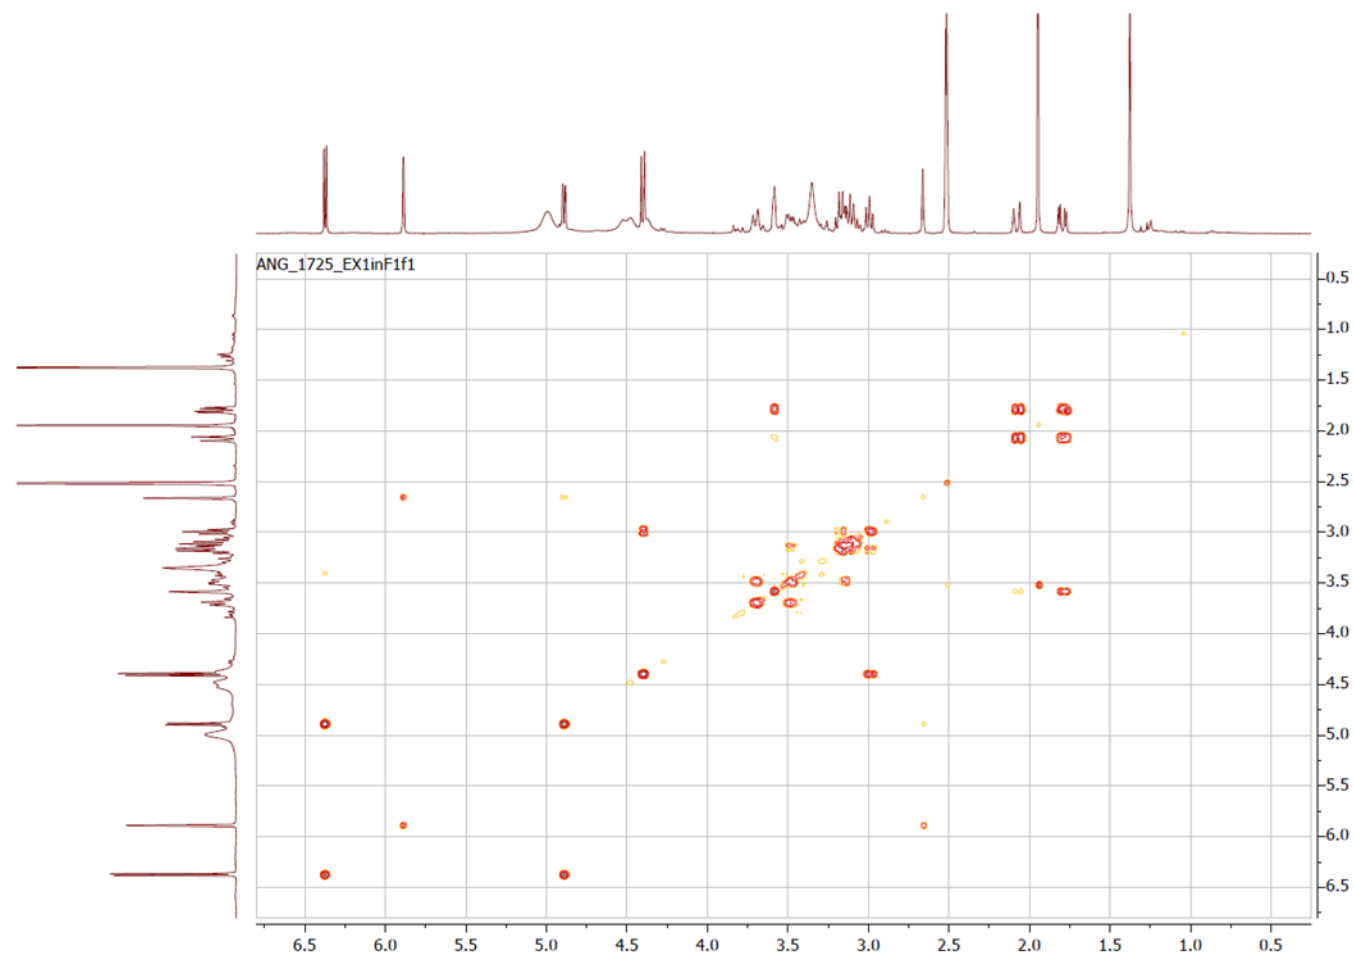

**Figure S23.** COSY spectrum of 8-*O*-acetylharpagide ( $\text{DMSO}-d_6$ )

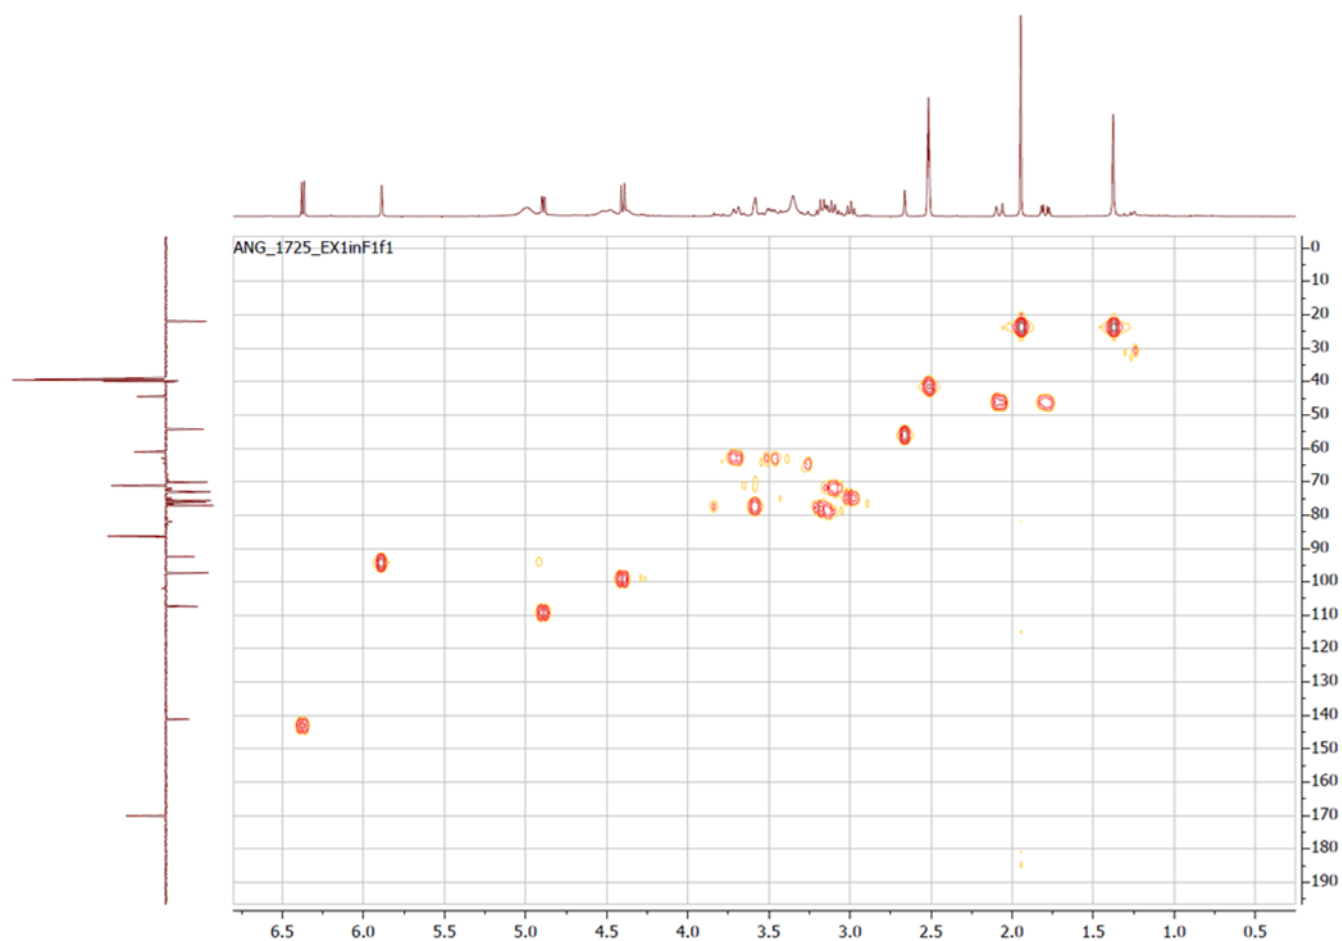

**Figure S24.** HSQC spectrum of 8-*O*-acetylharpagide (DMSO- $d_6$ )

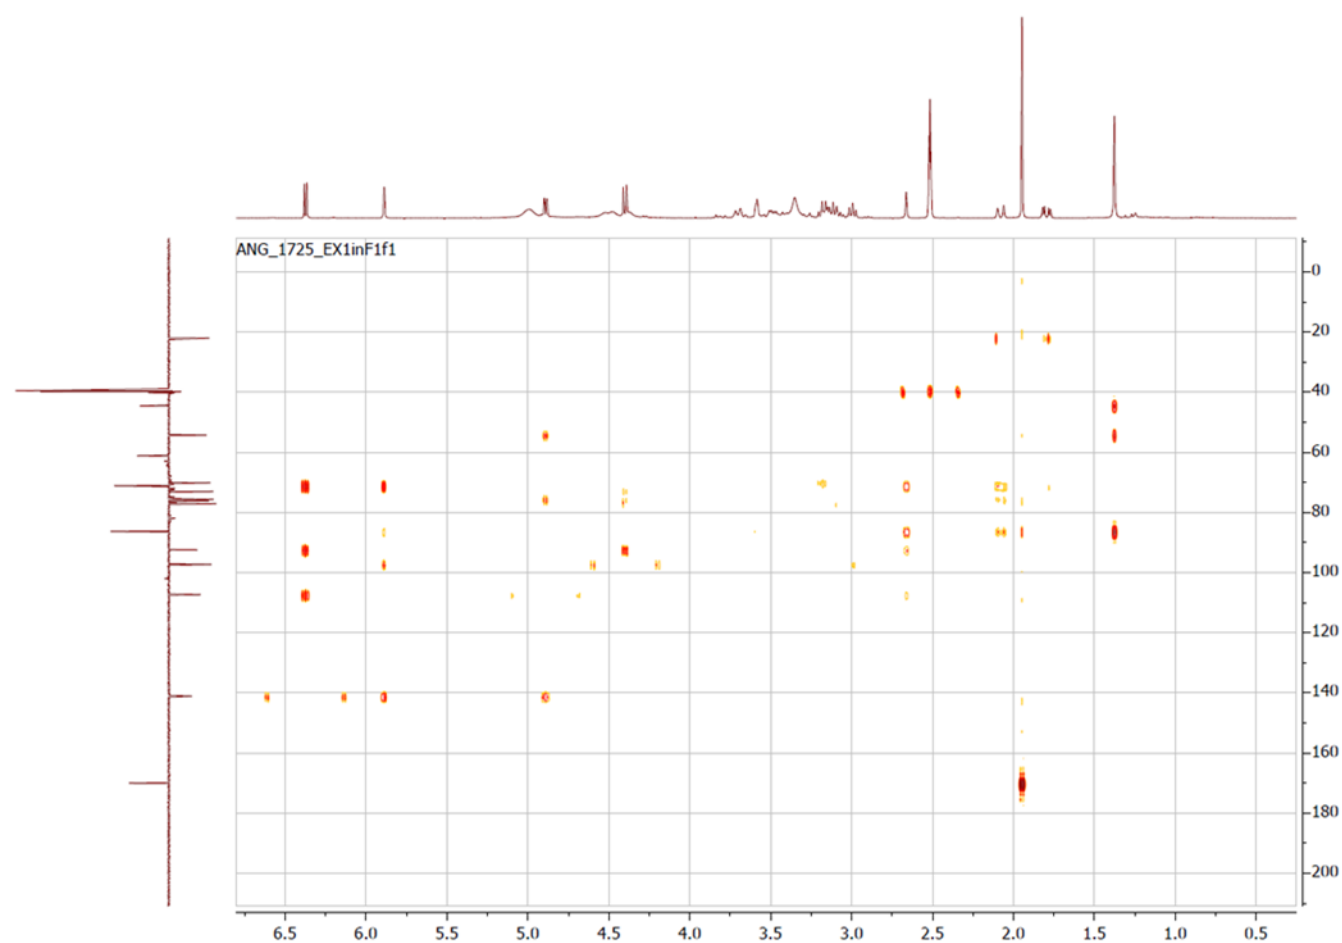

**Figure S25.** HMBC spectrum of 8-*O*-acetylharpagide (DMSO- $d_6$ )

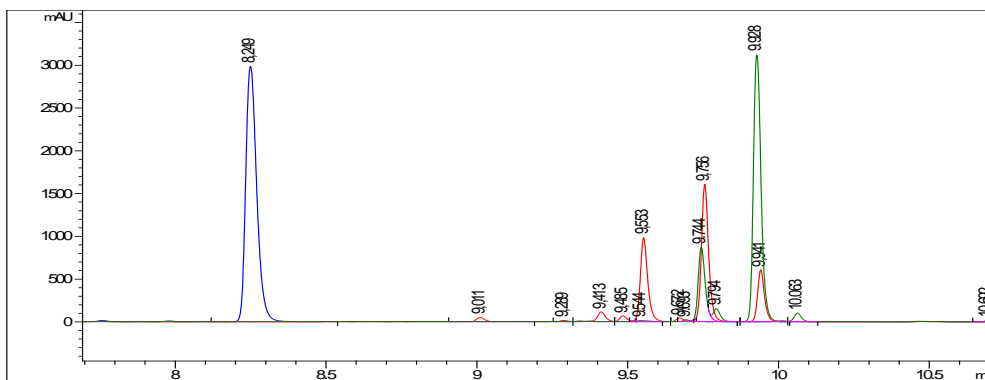

**Figure S26.** Acetylation reaction: HPLC chromatograms of harpagoside (blue), after 24 h of reaction (4 h at 70 °C and 20 h at room temperature, red) and after 6 more days of reaction (green)

**Figure S27.** Expression analysis of selected RNA for keratinocytes (NHEK) from sample 1

SPL-0005 : Expression analysis of selected RNA

| FD190914 - mQPA 43 genes                                                                                                    | Genes  | Abbreviation                                                                                 | Control        |                | Apolar extract            |                | Intermediate extract |                | Polar extract        |                | 8-O-acetyltharpagide |                | Polyphenols fraction |                | Iridoids fraction |  |
|-----------------------------------------------------------------------------------------------------------------------------|--------|----------------------------------------------------------------------------------------------|----------------|----------------|---------------------------|----------------|----------------------|----------------|----------------------|----------------|----------------------|----------------|----------------------|----------------|-------------------|--|
|                                                                                                                             |        |                                                                                              | -              |                | 2.74 x 10 <sup>-4</sup> % |                | 0.0025%              |                | 0.06%                |                | 0.0024%              |                | 0.0024%              |                | 0.0226%           |  |
|                                                                                                                             |        |                                                                                              | Cycles         |                | % control<br>Mean HK      |                | Cycles               |                | % control<br>Mean HK |                | Cycles               |                | % control<br>Mean HK |                | Cycles            |  |
|                                                                                                                             |        |                                                                                              |                |                |                           |                |                      |                |                      |                |                      |                |                      |                |                   |  |
| Housekeeping                                                                                                                | GAPDH  | Glyceraldehyde-3-phosphate dehydrogenase                                                     | 17,92<br>18,00 | 18,10<br>17,98 | 99                        | 17,80<br>17,74 | 103                  | 18,01<br>17,97 | 109                  | 18,33<br>18,08 | 99                   | 17,94<br>17,85 | 102                  | 18,04<br>17,93 | 119               |  |
|                                                                                                                             | B2M    | Beta-2-microglobulin                                                                         | 25,16<br>24,82 | 24,50<br>24,23 | 161                       | 25,72<br>25,24 | 65                   | 25,64<br>25,13 | 86                   | 24,58<br>24,62 | 153                  | 25,89<br>25,48 | 60                   | 25,46<br>25,34 | 91                |  |
|                                                                                                                             | RPLP0  | Ribosomal protein, large, P0                                                                 | 18,96<br>18,86 | 18,88<br>18,80 | 110                       | 18,73<br>18,75 | 102                  | 19,14<br>19,09 | 97                   | 18,99<br>18,94 | 113                  | 18,84<br>18,80 | 103                  | 19,44<br>19,34 | 87                |  |
|                                                                                                                             | RPS28  | Ribosomal protein S28                                                                        | 19,23<br>19,30 | 19,49<br>19,50 | 89                        | 19,25<br>19,26 | 91                   | 19,68<br>19,74 | 82                   | 19,74<br>19,74 | 84                   | 19,37<br>19,30 | 93                   | 20,12<br>20,02 | 69                |  |
|                                                                                                                             | FLG    | Filaggrin                                                                                    | 26,74<br>26,89 | 26,58<br>26,71 | 118                       | 26,87<br>26,78 | 90                   | 26,73<br>26,88 | 112                  | 27,09<br>27,09 | 97                   | 27,00<br>26,78 | 92                   | 27,29<br>27,50 | 81                |  |
| Keratinocytes differentiation                                                                                               | IVL    | Involucrin                                                                                   | 27,12<br>27,11 | 26,80<br>27,06 | 119                       | 27,44<br>27,47 | 71                   | 25,76<br>25,83 | 278                  | 27,50<br>27,28 | 97                   | 27,68<br>27,65 | 66                   | 27,59<br>27,49 | 90                |  |
|                                                                                                                             | KRT10  | Keratin 10                                                                                   | 23,67<br>23,79 | 23,94<br>24,05 | 87                        | 24,14<br>24,36 | 63                   | 23,21<br>23,18 | 161                  | 24,36<br>24,35 | 76                   | 23,90<br>23,98 | 84                   | 24,26<br>24,22 | 85                |  |
|                                                                                                                             | KRT5   | keratin 5, type II                                                                           | 20,54<br>20,68 | 20,78<br>20,94 | 88                        | 21,18<br>21,18 | 61                   | 20,97<br>20,95 | 87                   | 21,07<br>21,09 | 85                   | 21,30<br>21,39 | 58                   | 22,62<br>22,55 | 31                |  |
|                                                                                                                             | LOR    | Loricrin                                                                                     | 27,01<br>27,08 | 26,57<br>26,70 | 139                       | 26,91<br>26,85 | 101                  | 27,20<br>27,52 | 90                   | 27,08<br>27,19 | 110                  | 26,93<br>26,96 | 104                  | 27,19<br>27,21 | 109               |  |
|                                                                                                                             | TGM1   | transglutaminase 1                                                                           | 23,77<br>23,83 | 23,90<br>24,04 | 93                        | 25,63<br>25,60 | 26                   | 23,71<br>23,67 | 120                  | 24,59<br>24,31 | 75                   | 26,01<br>25,97 | 21                   | 27,42<br>27,50 | 10                |  |
|                                                                                                                             | MMP1   | matrix metalloproteinase 1                                                                   | 26,58<br>26,70 | 26,72<br>26,99 | 90                        | 26,99<br>26,28 | 105                  | 26,73<br>26,60 | 110                  | 26,87<br>26,76 | 98                   | 26,87<br>26,76 | 104                  | 24,99<br>25,04 | 374               |  |
|                                                                                                                             | MMP9   | matrix metalloproteinase 9                                                                   | 30,56<br>30,56 | 30,43<br>30,51 | 111                       | 30,28<br>30,80 | 93                   | 29,89<br>29,80 | 183                  | 30,06<br>29,83 | 180                  | 29,74<br>29,50 | 187                  | 28,62<br>28,62 | 465               |  |
| Extracellular matrix degradation                                                                                            | TIMP1  | TIMP metalloproteinase inhibitor 1                                                           | 20,63<br>20,56 | 20,95<br>20,84 | 85                        | 21,44<br>21,28 | 53                   | 21,23<br>21,14 | 74                   | 21,08<br>21,11 | 83                   | 21,01<br>20,92 | 75                   | 19,75<br>19,61 | 229               |  |
|                                                                                                                             | TIMP2  | TIMP metalloproteinase inhibitor 2                                                           | 29,10<br>29,31 | 29,21<br>29,34 | 99                        | 29,64<br>29,43 | 72                   | 29,83<br>29,63 | 77                   | 29,55<br>29,64 | 89                   | 29,50<br>29,80 | 72                   | 29,61<br>29,79 | 86                |  |
|                                                                                                                             | AKT1   | V-akt murine thymoma viral oncogene homolog 1                                                | 26,58<br>26,82 | 26,78<br>26,75 | 100                       | 26,83<br>26,85 | 82                   | 26,97<br>27,00 | 91                   | 26,99<br>26,99 | 98                   | 26,98<br>26,80 | 85                   | 26,76<br>26,87 | 112               |  |
|                                                                                                                             | BAX    | BCL2-associated X protein                                                                    | 27,77<br>28,00 | 27,81<br>27,75 | 112                       | 27,72<br>27,85 | 101                  | 27,76<br>27,68 | 129                  | 27,61<br>27,73 | 127                  | 27,51<br>27,74 | 116                  | 26,09<br>26,53 | 88                |  |
| Apoptosis                                                                                                                   | CASP3  | Caspase 3, apoptosis-related cysteine peptidase                                              | 26,65<br>26,84 | 26,44<br>26,62 | 121                       | 26,86<br>26,70 | 88                   | 26,83<br>26,88 | 103                  | 26,89<br>26,90 | 105                  | 26,56<br>26,66 | 106                  | 26,52<br>26,52 | 140               |  |
|                                                                                                                             | FOS    | FBJ murine osteosarcoma viral oncogene homolog                                               | 28,69<br>28,85 | 28,96<br>29,10 | 87                        | 28,47<br>28,29 | 118                  | 28,01<br>28,19 | 177                  | 28,48<br>28,55 | 140                  | 27,94<br>28,12 | 162                  | 28,80<br>28,99 | 111               |  |
|                                                                                                                             | TP53   | Tumor protein p53                                                                            | 26,68<br>26,71 | 26,55<br>26,87 | 104                       | 26,34<br>26,45 | 111                  | 26,93<br>26,82 | 98                   | 26,75<br>26,82 | 110                  | 26,70<br>26,52 | 103                  | 28,02<br>28,11 | 47                |  |
|                                                                                                                             | CDH1   | cadherin 1, type 1                                                                           | 23,49<br>23,13 | 23,91<br>24,14 | 63                        | 23,60<br>23,82 | 68                   | 23,27<br>23,05 | 123                  | 23,28<br>23,43 | 113                  | 23,04<br>23,59 | 98                   | 22,85<br>22,75 | 171               |  |
|                                                                                                                             | CLDN1  | claudin 1                                                                                    | 23,11<br>23,21 | 23,31<br>23,30 | 94                        | 23,78<br>23,74 | 60                   | 23,27<br>23,21 | 105                  | 23,23<br>23,23 | 112                  | 24,04<br>23,92 | 55                   | 25,48<br>25,44 | 25                |  |
| Cell-cell interactions                                                                                                      | DSC1   | desmocollin 1                                                                                | 26,68<br>30,13 | 29,94<br>30,20 | 92                        | 30,46<br>30,68 | 56                   | 28,61<br>28,73 | 259                  | 30,62<br>30,65 | 70                   | 29,94<br>30,54 | 81                   | 32,14<br>32,06 | 26                |  |
|                                                                                                                             | DSP    | desmoplakin                                                                                  | 22,82<br>22,68 | 22,63<br>22,20 | 133                       | 23,60<br>23,28 | 56                   | 22,65<br>22,48 | 127                  | 22,73<br>22,64 | 123                  | 23,51<br>23,34 | 61                   | 23,75<br>23,72 | 61                |  |
|                                                                                                                             | ITGA6  | Integrin, alpha 6                                                                            | 24,69<br>24,69 | 24,67<br>24,87 | 99                        | 24,89<br>24,72 | 84                   | 24,80<br>24,82 | 103                  | 24,83<br>24,70 | 111                  | 24,77<br>24,56 | 99                   | 24,78<br>24,66 | 119               |  |
|                                                                                                                             | ITGB1  | Integrin, beta 1 (fibronectin receptor, beta polypeptide, antigen CD29 includes MDF2, MSK12) | 20,66<br>20,63 | 20,72<br>20,63 | 102                       | 20,79<br>20,63 | 87                   | 20,88<br>20,89 | 94                   | 21,03<br>20,96 | 92                   | 20,56<br>20,49 | 106                  | 20,60<br>20,53 | 128               |  |
|                                                                                                                             | LGALS1 | Lectin, galactoside-binding, soluble, 1                                                      | 21,32<br>21,24 | 21,58<br>21,54 | 86                        | 21,46<br>21,37 | 82                   | 22,95<br>22,92 | 35                   | 22,02<br>22,02 | 70                   | 21,52<br>21,51 | 82                   | 22,36<br>22,29 | 59                |  |
|                                                                                                                             | LGALS7 | lectin, galactoside-binding, soluble, 7                                                      | 23,53<br>23,60 | 23,75<br>23,83 | 89                        | 23,73<br>23,72 | 81                   | 23,88<br>23,94 | 88                   | 24,55<br>24,52 | 60                   | 23,86<br>23,91 | 81                   | 25,58<br>25,64 | 29                |  |
|                                                                                                                             | GPX1   | glutathione peroxidase 1                                                                     | 22,32<br>22,29 | 22,32<br>22,29 | 105                       | 21,79<br>21,79 | 129                  | 22,97<br>22,96 | 71                   | 22,62<br>22,59 | 95                   | 22,05<br>21,97 | 119                  | 22,48<br>22,48 | 106               |  |
|                                                                                                                             | HIF1A  | Hypoxia inducible factor 1, alpha subunit (basic helix-loop-helix transcription factor)      | 24,69<br>24,86 | 24,62<br>24,67 | 114                       | 24,84<br>24,83 | 87                   | 25,05<br>25,02 | 93                   | 25,05<br>25,03 | 97                   | 24,91<br>24,94 | 87                   | 25,10<br>25,14 | 95                |  |
|                                                                                                                             | HMOX1  | Heme oxygenase (decycling) 1                                                                 | 27,61<br>27,79 | 27,16<br>27,62 | 131                       | 27,74<br>27,86 | 84                   | 27,91<br>27,99 | 94                   | 27,57<br>27,80 | 119                  | 28,02<br>27,90 | 81                   | 27,52<br>27,68 | 130               |  |
|                                                                                                                             | HSPB1  | heat shock 27kDa protein 1                                                                   | 18,64<br>18,71 | 18,97<br>18,93 | 86                        | 20,01<br>20,00 | 36                   | 19,12<br>19,13 | 82                   | 19,53<br>19,53 | 65                   | 19,99<br>20,00 | 39                   | 21,24<br>21,27 | 20                |  |
| Response to oxidative and et cellular stress                                                                                | NFKB1  | Nuclear factor of kappa light polypeptide gene enhancer in B-cells 1                         | 25,30<br>25,51 | 25,18<br>25,23 | 120                       | 25,50<br>25,47 | 85                   | 25,29<br>25,36 | 118                  | 25,48<br>25,32 | 118                  | 25,37<br>25,38 | 99                   | 25,32<br>25,31 | 129               |  |
|                                                                                                                             | NQO1   | NAD(P)H dehydrogenase, quinone 1                                                             | 26,61<br>26,74 | 26,45<br>26,36 | 126                       | 26,81<br>26,79 | 83                   | 26,04<br>25,88 | 183                  | 26,07<br>25,85 | 193                  | 26,85<br>27,06 | 80                   | 25,99<br>25,71 | 216               |  |
|                                                                                                                             | SOD1   | Superoxide dismutase 1, soluble                                                              | 22,94<br>22,98 | 22,90<br>22,90 | 109                       | 22,91<br>22,72 | 100                  | 23,03<br>22,94 | 110                  | 23,10<br>23,06 | 108                  | 23,07<br>22,85 | 97                   | 23,23<br>23,20 | 102               |  |
|                                                                                                                             | IL1A   | Interleukin 1, alpha                                                                         | 23,80<br>23,91 | 23,79<br>23,59 | 117                       | 23,55<br>23,15 | 129                  | 23,58<br>23,45 | 141                  | 23,53<br>23,29 | 160                  | 23,88<br>23,53 | 108                  | 23,23<br>23,05 | 199               |  |
|                                                                                                                             | IL6    | Interleukin 6                                                                                | nd<br>nd       | nd<br>nd       | -                         | nd<br>nd       | -                    | nd<br>nd       | -                    | nd<br>nd       | -                    | nd<br>nd       | -                    | nd<br>nd       | -                 |  |
| Translation regulation                                                                                                      | MAPK1  | mitogen-activated protein kinase 1                                                           | 25,52<br>25,73 | 25,51<br>25,66 | 107                       | 25,66<br>25,62 | 89                   | 25,67<br>25,63 | 109                  | 25,83<br>25,83 | 101                  | 25,62<br>25,57 | 99                   | 25,65<br>25,70 | 117               |  |
|                                                                                                                             | MAPK14 | mitogen-activated protein kinase 14                                                          | 26,79<br>27,02 | 26,91<br>27,08 | 98                        | 27,03<br>27,05 | 82                   | 26,96<br>27,03 | 104                  | 27,16<br>27,18 | 97                   | 27,09<br>27,16 | 83                   | 27,47<br>27,32 | 86                |  |
|                                                                                                                             | EGFR   | epidermal growth factor receptor                                                             | 23,87<br>23,81 | 23,92<br>23,81 | 103                       | 23,82<br>23,77 | 93                   | 24,56<br>24,48 | 70                   | 24,20<br>24,02 | 97                   | 24,14<br>24,03 | 82                   | 24,58<br>24,43 | 77                |  |
| Cellular cycle / Growth factor / Transcription factors                                                                      | JUN    | Jun proto-oncogene                                                                           | 28,53<br>28,93 | 28,10<br>28,30 | 150                       | 28,42<br>28,57 | 105                  | 28,61<br>28,69 | 117                  | 28,56<br>28,43 | 137                  | 28,58<br>28,71 | 102                  | 28,62<br>28,79 | 122               |  |
|                                                                                                                             | NOTCH1 | Notch 1                                                                                      | 27,88<br>28,27 | 28,05<br>28,50 | 91                        | 28,86<br>28,98 | 50                   | 29,00<br>28,91 | 60                   | 28,45<br>28,29 | 95                   | 29,15<br>29,42 | 42                   | 30,13<br>30,03 | 30                |  |
|                                                                                                                             | TGFB1  | Transforming growth factor, beta 1                                                           | 23,86<br>23,93 | 23,98<br>23,92 | 101                       | 23,95<br>23,91 | 88                   | 24,13<br>23,98 | 100                  | 24,10<br>24,06 | 103                  | 24,09<br>24,09 | 85                   | 23,87<br>23,75 | 129               |  |
|                                                                                                                             | TP63   | Tumor protein p63                                                                            | 26,02<br>26,14 | 26,04<br>26,22 | 101                       | 26,58<br>26,27 | 81                   | 26,50<br>26,43 | 83                   | 26,50<br>26,49 | 88                   | 26,32<br>26,25 | 84                   | 26,89<br>26,89 | 69                |  |
|                                                                                                                             | FOXO1  | Forkhead box O1                                                                              | 26,56<br>26,66 | 26,21<br>26,28 | 135                       | 26,71<br>26,81 | 81                   | 26,93<br>26,86 | 91                   | 26,68<br>26,76 | 109                  | 26,88<br>26,98 | 78                   | 27,10<br>27,14 | 85                |  |
|                                                                                                                             |        |                                                                                              |                |                |                           |                |                      |                |                      |                |                      |                |                      |                |                   |  |
| Stimulation (Arbitrary selection): % > 200                                                                                  |        |                                                                                              |                |                |                           |                |                      |                |                      |                |                      |                |                      |                |                   |  |
| Inhibition (Arbitrary selection): % < 50                                                                                    |        |                                                                                              |                |                |                           |                |                      |                |                      |                |                      |                |                      |                |                   |  |
| Results to be interpreted with caution (high cycle count indicating low relative expression, close to detection limit) > 31 |        |                                                                                              |                |                |                           |                |                      |                |                      |                |                      |                |                      |                |                   |  |
| Not detected or non-compliant melting curve                                                                                 |        |                                                                                              |                |                |                           |                |                      |                |                      |                |                      |                |                      |                |                   |  |
| nd                                                                                                                          |        |                                                                                              |                |                |                           |                |                      |                |                      |                |                      |                |                      |                |                   |  |

Figure S28. Expression analysis of selected RNA for keratinocytes (NHEK) from sample 2

SPL-0005 : Expression analysis of selected RNA

|                                                                                                                             |              |                                                                                              | Control        | Apolar extract            |                   | Intermediate extract |                   | Polar extract  |                   | 8-O-acetyltharpagide |                   | Polyphenols fraction |                   | Iridoids fraction |                   |
|-----------------------------------------------------------------------------------------------------------------------------|--------------|----------------------------------------------------------------------------------------------|----------------|---------------------------|-------------------|----------------------|-------------------|----------------|-------------------|----------------------|-------------------|----------------------|-------------------|-------------------|-------------------|
| FD190914 - mQPA 43 genes                                                                                                    | Genes        |                                                                                              | -              | 2.74 x 10 <sup>-4</sup> % |                   | 0.0025%              |                   | 0.06%          |                   | 0.0024%              |                   | 0.0024%              |                   | 0.0226%           |                   |
|                                                                                                                             | Abbreviation |                                                                                              | Cycles         | Cycles                    | % control Mean HK | Cycles               | % control Mean HK | Cycles         | % control Mean HK | Cycles               | % control Mean HK | Cycles               | % control Mean HK | Cycles            | % control Mean HK |
| Housekeeping                                                                                                                | GAPDH        | Glyceraldehyde-3-phosphate dehydrogenase                                                     | 18,16<br>18,14 | 18,58<br>18,53            | 97                | 18,43<br>18,55       | 98                | 18,52<br>18,49 | 109               | 18,30<br>18,17       | 106               | 18,15<br>18,00       | 104               | 18,89<br>18,97    | 97                |
|                                                                                                                             | B2M          | Beta-2-microglobulin                                                                         | 25,59<br>25,58 | 26,09<br>25,65            | 106               | 26,80<br>26,50       | 60                | 24,99<br>25,09 | 203               | 25,60<br>25,84       | 103               | 25,80<br>25,87       | 83                | 25,89<br>26,05    | 128               |
|                                                                                                                             | RPLP0        | Ribosomal protein, large, P0                                                                 | 19,90<br>18,83 | 19,08<br>19,19            | 106               | 19,03<br>19,10       | 108               | 19,51<br>19,38 | 93                | 19,13<br>19,14       | 93                | 18,89<br>18,89       | 97                | 19,53<br>19,49    | 107               |
|                                                                                                                             | RPS28        | Ribosomal protein S28                                                                        | 19,36<br>19,38 | 19,69<br>19,80            | 99                | 19,78<br>19,83       | 92                | 20,00<br>20,03 | 89                | 19,62<br>19,59       | 96                | 19,48<br>19,37       | 95                | 20,18<br>20,17    | 96                |
|                                                                                                                             | FLG          | Filaggrin                                                                                    | 27,06<br>26,92 | 27,20<br>27,27            | 108               | 26,91<br>27,09       | 124               | 27,27<br>27,20 | 117               | 26,74<br>26,94       | 125               | 26,58<br>26,81       | 121               | 26,75<br>26,76    | 197               |
|                                                                                                                             | IVL          | Involucrin                                                                                   | 27,67<br>27,70 | 27,76<br>27,73            | 123               | 27,75<br>27,67       | 122               | 26,53<br>26,53 | 309               | 27,35<br>27,44       | 137               | 27,33<br>27,21       | 132               | 27,18<br>27,13    | 242               |
| Keratinocytes differentiation                                                                                               | KRT10        | Keratin 10                                                                                   | 24,59<br>24,51 | 24,81<br>24,79            | 108               | 24,67<br>24,70       | 113               | 23,84<br>23,93 | 220               | 24,42<br>24,59       | 116               | 24,02<br>24,05       | 141               | 24,53<br>24,58    | 167               |
|                                                                                                                             | KRT5         | keratin 5, type II                                                                           | 21,51<br>21,53 | 22,02<br>22,03            | 90                | 22,17<br>22,05       | 83                | 22,36<br>22,31 | 79                | 22,11<br>21,95       | 79                | 21,94<br>21,85       | 76                | 23,84<br>23,88    | 33                |
|                                                                                                                             | LOR          | Loricrin                                                                                     | 26,61<br>26,87 | 26,92<br>27,06            | 107               | 26,77<br>26,97       | 114               | 27,09<br>27,28 | 102               | 26,49<br>26,53       | 131               | 26,46<br>26,52       | 117               | 26,44<br>26,49    | 202               |
|                                                                                                                             | TGM1         | transglutaminase 1                                                                           | 24,93<br>24,85 | 25,51<br>25,51            | 83                | 26,47<br>26,49       | 41                | 25,29<br>25,23 | 107               | 24,99<br>25,09       | 101               | 27,09<br>27,03       | 22                | 28,11<br>28,03    | 18                |
|                                                                                                                             | MMP1         | matrix metalloproteinase 1                                                                   | 26,00<br>26,01 | 25,98<br>26,11            | 125               | 25,12<br>25,08       | 233               | 25,51<br>25,54 | 194               | 26,08<br>26,04       | 108               | 24,99<br>25,03       | 197               | 24,96<br>24,98    | 343               |
|                                                                                                                             | MMP9         | matrix metalloproteinase 9                                                                   | 30,90<br>30,58 | 30,63<br>31,07            | 119               | 31,26<br>31,19       | 88                | 29,77<br>30,09 | 243               | 30,61<br>30,59       | 123               | 30,05<br>29,89       | 167               | 29,86<br>30,07    | 285               |
| Extracellular matrix degradation                                                                                            | TIMP1        | TIMP metalloproteinase inhibitor 1                                                           | 21,02<br>20,96 | 21,61<br>21,59            | 84                | 21,69<br>21,56       | 80                | 21,66<br>21,57 | 90                | 21,34<br>21,21       | 92                | 21,14<br>21,13       | 89                | 19,85<br>19,82    | 372               |
|                                                                                                                             | TIMP2        | TIMP metalloproteinase inhibitor 2                                                           | 28,96<br>29,23 | 29,15<br>29,57            | 107               | 29,30<br>29,50       | 101               | 29,97<br>30,08 | 73                | 29,41<br>29,43       | 89                | 29,21<br>29,52       | 82                | 30,57<br>30,54    | 61                |
|                                                                                                                             | AKT1         | V-akt murine thymoma viral oncogene homolog 1                                                | 26,71<br>26,85 | 26,97<br>27,18            | 104               | 26,83<br>27,14       | 109               | 27,20<br>27,19 | 104               | 27,02<br>27,20       | 89                | 26,56<br>26,70       | 109               | 27,84<br>27,81    | 81                |
|                                                                                                                             | BAX          | BCL2-associated X protein                                                                    | 27,58<br>27,82 | 27,53<br>27,64            | 138               | 27,94<br>28,04       | 102               | 27,81<br>28,05 | 118               | 27,85<br>28,03       | 95                | 27,58<br>27,45       | 112               | 28,66<br>28,71    | 84                |
|                                                                                                                             | CASP3        | Caspase 3, apoptosis-related cysteine peptidase                                              | 26,85<br>26,87 | 26,80<br>27,04            | 123               | 26,78<br>26,90       | 126               | 26,82<br>26,83 | 142               | 27,00<br>27,23       | 94                | 26,68<br>26,51       | 119               | 27,49<br>27,30    | 116               |
|                                                                                                                             | FOS          | FBJ murine osteosarcoma viral oncogene homolog                                               | 28,10<br>28,50 | 28,45<br>28,59            | 109               | 28,10<br>28,47       | 126               | 28,22<br>27,99 | 158               | 28,03<br>28,19       | 127               | 27,82<br>27,88       | 134               | 29,82<br>29,60    | 63                |
| Apoptosis                                                                                                                   | TP53         | Tumor protein p53                                                                            | 26,33<br>26,61 | 26,78<br>26,99            | 96                | 26,97<br>27,03       | 86                | 26,75<br>26,89 | 109               | 26,74<br>26,83       | 90                | 26,55<br>26,59       | 92                | 29,04<br>28,93    | 29                |
|                                                                                                                             | CDH1         | cadherin 1, type 1                                                                           | 23,43<br>23,89 | 23,01<br>23,03            | 197               | 22,51<br>23,21       | 220               | 22,94<br>22,83 | 235               | 23,01<br>23,74       | 140               | 23,10<br>22,52       | 179               | 23,21<br>23,79    | 188               |
|                                                                                                                             | CLDN1        | claudin 1                                                                                    | 23,94<br>23,90 | 24,52<br>24,64            | 81                | 24,80<br>24,83       | 67                | 23,72<br>23,61 | 166               | 23,95<br>23,91       | 112               | 24,97<br>25,00       | 47                | 26,24<br>26,46    | 31                |
|                                                                                                                             | DSC1         | desmocollin 1                                                                                | 32,13<br>32,54 | 31,19<br>31,10            | 289               | 32,05<br>31,97       | 155               | 31,52<br>31,44 | 249               | 32,01<br>32,46       | 121               | 31,55<br>31,62       | 164               | 32,27<br>32,42    | 165               |
|                                                                                                                             | DSP          | desmoplakin                                                                                  | 23,51<br>23,65 | 23,63<br>23,72            | 120               | 23,64<br>23,96       | 107               | 23,21<br>23,24 | 177               | 23,90<br>23,64       | 99                | 23,71<br>23,44       | 99                | 25,02<br>24,90    | 64                |
|                                                                                                                             | ITGA6        | Integrin, alpha 6                                                                            | 24,71<br>24,78 | 24,80<br>24,87            | 120               | 24,67<br>24,65       | 132               | 24,72<br>24,81 | 137               | 25,13<br>24,92       | 93                | 24,42<br>24,17       | 135               | 25,64<br>25,56    | 92                |
| Cell-cell interactions                                                                                                      | ITGB1        | Integrin, beta 1 (fibronectin receptor, beta polypeptide, antigen CD29 includes MDF2, MSK12) | 20,83<br>20,81 | 21,07<br>21,01            | 110               | 20,98<br>20,99       | 111               | 21,10<br>21,05 | 116               | 21,17<br>21,02       | 93                | 20,50<br>20,45       | 125               | 21,01<br>21,00    | 147               |
|                                                                                                                             | LGALS1       | Lectin, galactoside-binding, soluble, 1                                                      | 20,25<br>20,28 | 20,65<br>20,62            | 99                | 20,60<br>20,60       | 99                | 21,54<br>21,51 | 58                | 20,75<br>20,74       | 81                | 20,10<br>20,10       | 111               | 21,14<br>21,08    | 93                |
|                                                                                                                             | LGALS7       | lectin, galactoside-binding, soluble, 7                                                      | 24,03<br>24,09 | 24,79<br>24,91            | 74                | 25,05<br>25,17       | 60                | 25,23<br>25,25 | 61                | 24,84<br>24,79       | 67                | 24,50<br>24,49       | 73                | 26,30<br>26,49    | 33                |
|                                                                                                                             | GPX1         | glutathione peroxidase 1                                                                     | 22,19<br>22,13 | 22,61<br>22,51            | 97                | 22,28<br>22,23       | 117               | 22,50<br>22,69 | 93                | 22,50<br>22,44       | 91                | 21,96<br>21,92       | 115               | 22,78<br>22,79    | 108               |
|                                                                                                                             | HIF1A        | Hypoxia inducible factor 1, alpha subunit (basic helix-loop-helix transcription factor)      | 24,81<br>24,91 | 24,91<br>25,05            | 118               | 24,91<br>24,97       | 118               | 24,91<br>24,98 | 131               | 24,93<br>24,94       | 107               | 24,68<br>24,72       | 110               | 25,09<br>25,21    | 137               |
|                                                                                                                             | HMOX1        | Heme oxygenase (decycling) 1                                                                 | 27,62<br>28,08 | 27,93<br>28,07            | 114               | 27,90<br>28,01       | 114               | 28,16<br>28,02 | 116               | 27,57<br>27,68       | 130               | 27,66<br>27,65       | 112               | 27,48<br>27,44    | 216               |
| Response to oxidative and et cellular stress                                                                                | HSPB1        | heat shock 27kDa protein 1                                                                   | 19,74<br>19,83 | 20,34<br>20,37            | 86                | 20,98<br>21,04       | 53                | 20,38<br>20,38 | 92                | 20,30<br>20,33       | 78                | 20,92<br>20,97       | 44                | 22,34<br>22,31    | 29                |
|                                                                                                                             | NFKB1        | Nuclear factor of kappa light polypeptide gene enhancer in B-cells 1                         | 25,26<br>25,30 | 25,58<br>25,56            | 105               | 25,51<br>25,46       | 108               | 24,68<br>24,66 | 212               | 25,55<br>25,48       | 96                | 25,05<br>25,01       | 117               | 25,29<br>25,28    | 167               |
|                                                                                                                             | NQO1         | NAD(P)H dehydrogenase, quinone 1                                                             | 27,61<br>27,44 | 27,18<br>27,49            | 147               | 26,69<br>26,83       | 212               | 26,32<br>26,49 | 302               | 27,01<br>26,96       | 163               | 27,09<br>26,88       | 144               | 25,99<br>25,89    | 501               |
|                                                                                                                             | SOD1         | Superoxide dismutase 1, soluble                                                              | 23,14<br>23,19 | 23,53<br>23,47            | 101               | 23,21<br>23,19       | 122               | 23,65<br>23,55 | 103               | 23,54<br>23,31       | 94                | 23,02<br>22,96       | 111               | 23,64<br>23,64    | 120               |
|                                                                                                                             | IL1A         | interleukin 1, alpha                                                                         | 23,70<br>23,66 | 23,88<br>23,83            | 113               | 23,36<br>23,28       | 160               | 22,32<br>22,10 | 386               | 23,88<br>23,64       | 107               | 23,21<br>23,05       | 145               | 23,65<br>23,62    | 173               |
|                                                                                                                             | IL6          | interleukin 6                                                                                | nd<br>nd       | nd<br>nd                  | -                 | nd<br>nd             | -                 | nd<br>nd       | -                 | nd<br>nd             | -                 | nd<br>nd             | -                 | nd<br>nd          | -                 |
| Translation regulation                                                                                                      | MAPK1        | mitogen-activated protein kinase 1                                                           | 25,57<br>25,80 | 25,90<br>25,86            | 111               | 25,92<br>26,10       | 99                | 25,90<br>25,80 | 123               | 25,89<br>25,95       | 95                | 25,58<br>25,58       | 106               | 26,23<br>26,44    | 107               |
|                                                                                                                             | MAPK14       | mitogen-activated protein kinase 14                                                          | 27,21<br>27,28 | 27,21<br>27,59            | 116               | 27,33<br>27,51       | 110               | 27,15<br>27,15 | 148               | 27,56<br>27,28       | 100               | 26,90<br>27,00       | 121               | 27,81<br>27,99    | 106               |
|                                                                                                                             | EGFR         | epidermal growth factor receptor                                                             | 24,04<br>24,01 | 24,42<br>24,24            | 104               | 24,25<br>24,23       | 107               | 24,25<br>24,06 | 127               | 24,67<br>24,53       | 76                | 24,11<br>24,04       | 95                | 24,84<br>24,85    | 95                |
| Cellular cycle / Growth factor / Transcription factors                                                                      | JUN          | Jun proto-oncogene                                                                           | 28,63<br>28,83 | 28,55<br>28,56            | 144               | 28,52<br>28,68       | 136               | 28,76<br>28,91 | 129               | 28,50<br>28,59       | 128               | 27,82<br>28,09       | 169               | 27,85<br>28,17    | 277               |
|                                                                                                                             | NOTCH1       | Notch 1                                                                                      | 28,78<br>28,69 | 28,89<br>29,01            | 110               | 29,01<br>29,26       | 95                | 29,02<br>29,10 | 111               | 29,02<br>29,08       | 90                | 29,49<br>29,57       | 57                | 30,99<br>31,52    | 30                |
|                                                                                                                             | TGFB1        | Transforming growth factor, beta 1                                                           | 24,07<br>24,08 | 24,50<br>24,30            | 102               | 24,22<br>24,17       | 115               | 24,46<br>24,28 | 113               | 24,35<br>24,29       | 95                | 23,96<br>23,98       | 106               | 24,83<br>24,78    | 101               |
|                                                                                                                             | TP63         | Tumor protein p63                                                                            | 26,31<br>26,57 | 26,78<br>26,86            | 98                | 26,75<br>26,81       | 98                | 26,94<br>26,98 | 193               | 26,66<br>26,77       | 93                | 26,57<br>26,59       | 89                | 28,29<br>28,29    | 46                |
|                                                                                                                             | FOXO1        | Forkhead box O1                                                                              | 26,74<br>26,83 | 26,77<br>26,84            | 124               | 26,84<br>26,84       | 120               | 26,83<br>26,82 | 135               | 26,64<br>26,80       | 118               | 26,58<br>26,52       | 116               | 26,58<br>26,53    | 196               |
|                                                                                                                             |              |                                                                                              |                |                           |                   |                      |                   |                |                   |                      |                   |                      |                   |                   |                   |
| Simulation (Arbitrary selection): % > 200                                                                                   |              |                                                                                              | 200            |                           |                   |                      |                   |                |                   |                      |                   |                      |                   |                   |                   |
| Inhibition (Arbitrary selection): % < 50                                                                                    |              |                                                                                              | 50             |                           |                   |                      |                   |                |                   |                      |                   |                      |                   |                   |                   |
| Results to be interpreted with caution (high cycle count indicating low relative expression, close to detection limit) > 31 |              |                                                                                              | 31             |                           |                   |                      |                   |                |                   |                      |                   |                      |                   |                   |                   |
| Not detected or non-compliant melting curve / nd                                                                            |              |                                                                                              | nd             |                           |                   |                      |                   |                |                   |                      |                   |                      |                   |                   |                   |

Figure S29. Expression analysis of selected RNA for keratinocytes (NHEK) from sample 3

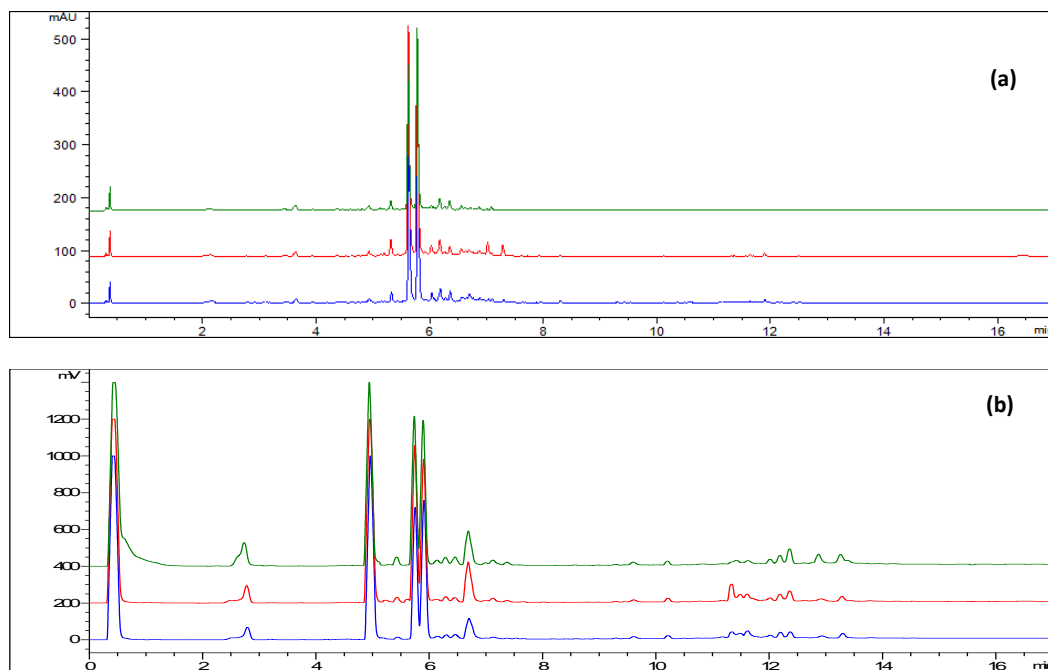

**Figure S30.** Interannual variability study on *Ajuga pyramidalis* ethanolic extracts, samples collected in 2017 (blue), 2018 (red), 2019 (green): **(a)** HPLC-DAD and **(b)** HPLC-ELSD chromatograms.
